# Supplementary material for: Spin-valley locking and bulk quantum Hall effect in a noncentrosymmetric Dirac semimetal BaMnSb2
Source: Springer Nature journal article supplement (doi:10.1038/s41467-021-24369-1), 2021-07-01
Supplement: 41467_2021_24369_MOESM1_ESM.pdf [file 41467_2021_24369_MOESM1_ESM.pdf]

**Supplementary Information**  
**Spin-valley locking and bulk quantum Hall effect in a noncentrosymmetric Dirac semimetal BaMnSb<sub>2</sub>**

**CONTENTS**

|                                                                                |    |
|--------------------------------------------------------------------------------|----|
| I. Supplementary Notes                                                         | 7  |
| 1. Orthorhombic lattice distortion detected by neutron scattering              | 7  |
| 2. SHG polarimetry and Theoretical Modeling                                    | 7  |
| 3. 2D electronic structure of BaMnSb <sub>2</sub>                              | 8  |
| 4. Tunneling mechanism for interlayer transport                                | 9  |
| 5. Transport measurements on sample <i>E</i> #1                                | 10 |
| 6. Zeeman Effect of BaMnSb <sub>2</sub>                                        | 11 |
| 7. Possible origins of the z-axis resistance plateau in the quantum Hall state | 12 |
| II. Supplementary Discussions                                                  | 13 |
| References                                                                     | 25 |

| Lattice constants ( $\text{\AA}$ ) a=4.5036 b=4.4701 c=24.6120 |        |     |        |
|----------------------------------------------------------------|--------|-----|--------|
| Wyckoff positions                                              | x      | y   | z      |
| Ba:4 <i>d</i>                                                  | 0.0059 | 0   | 0.1135 |
| Mn:4 <i>d</i>                                                  | 0.5046 | 0   | 0.2501 |
| Sb:2 <i>a</i>                                                  | 0.5172 | 0   | 0      |
| Sb:2 <i>b</i>                                                  | 0.9511 | 0.5 | 0      |
| Sb:4 <i>d</i>                                                  | 0.5054 | 0.5 | 0.1853 |

Supplementary Table 1. Lattice constants and Wyckoff positions of BaMnSb<sub>2</sub> with the space group I2mm derived from the DFT calculations.

| Sample label | Nominal composition                                   | $\mu_c$<br>(cm <sup>2</sup> /V s) | $n_{\text{Hall}}$<br>(10 <sup>19</sup> cm <sup>-3</sup> ) | $F$<br>(T) | $n_{2D}$<br>(10 <sup>12</sup> cm <sup>-2</sup> ) | $n_{\text{SDH}}$<br>(10 <sup>19</sup> cm <sup>-3</sup> ) | $\Phi_B$   | $s$ |
|--------------|-------------------------------------------------------|-----------------------------------|-----------------------------------------------------------|------------|--------------------------------------------------|----------------------------------------------------------|------------|-----|
| B#1          | BaMnSb <sub>2</sub>                                   | 1645                              | 0.61                                                      | 18.83      | 0.91                                             | 0.76                                                     | 0.97 $\pi$ | 1.5 |
| E#1          | Eu <sub>0.1</sub> Ba <sub>0.9</sub> MnSb <sub>2</sub> | 5040                              | 1.4                                                       | 30.58      | 1.48                                             | 1.24                                                     | 0.96 $\pi$ | 2.3 |
| E#2          | Eu <sub>0.1</sub> Ba <sub>0.9</sub> MnSb <sub>2</sub> | -                                 | -                                                         | 34.40      | 1.65                                             | 1.38                                                     | 0.89 $\pi$ | -   |
| E#3          | Eu <sub>0.1</sub> Ba <sub>0.9</sub> MnSb <sub>2</sub> | 556                               | 0.74                                                      | 17.90      | 0.87                                             | 0.72                                                     | 0.91 $\pi$ | 2.2 |
| Z#1          | BaMn <sub>0.9</sub> Zn <sub>0.1</sub> Sb <sub>2</sub> | 580                               | 0.093                                                     | 8.9        | 0.43                                             | 0.36                                                     | 0.86 $\pi$ | 1.5 |

Supplementary Table 2. **Quantum transport parameters of the five samples in the context.**  $\mu_c$ , the classical carrier mobility, and  $n_{\text{Hall}}$ , the carrier density, extracted from the Hall measurement.  $F$  is the quantum oscillation frequency.  $n_{2D}$  is the 2D carrier density in each Sb layer, derived by  $n_{2D} = 2eF/h$  according to Luttinger's theorem, where  $h$  is Planck's constant. The 3D carrier density is derived using  $n_{\text{SDH}} = n_{2D}/(c/2)$ , where  $c$  is the lattice parameter.  $\Phi_B$  is the Berry phase and  $s$  is the degeneracy per Sb layer.

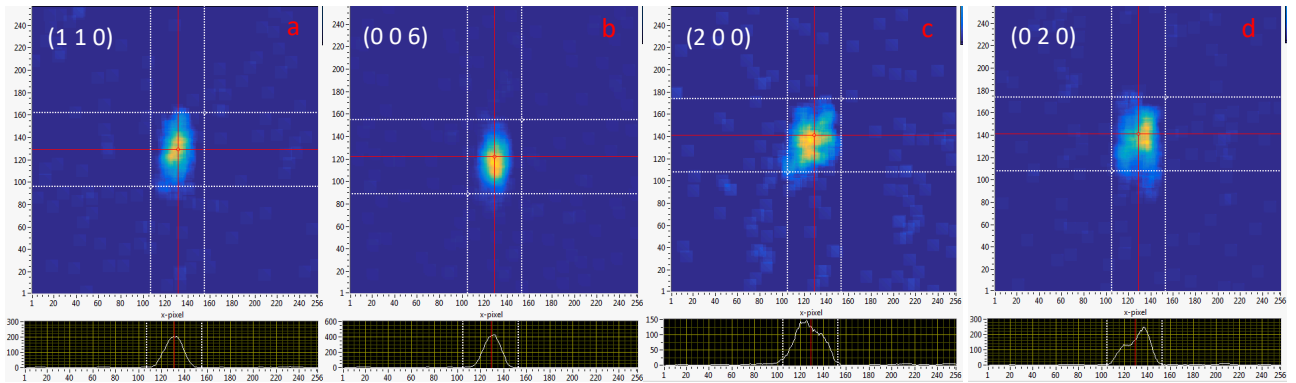

Supplementary Figure 1. **a-d** show the observed single crystal neutron diffraction spots at the detector at the Bragg peak positions of (1 1 0), (0 0 6), (2 0 0), and (0 2 0), respectively,  $T = 300\text{K}$ . The detector pixels (256 x 256) are showed for each plot. The bottom part of each plot shows the integrated intensity over vertical pixels in the range between two white dotted lines. The peak region framed by the white dotted lines has the same size for each peak spot as guide for eyes to tell the peak height and width. One can notice the peak spots (2 0 0) and (0 2 0) are broader than that of (1 1 0) and (0 0 6) in the horizontal width, indicating that an orthorhombic lattice distortion exists in BaMnSb<sub>2</sub>.

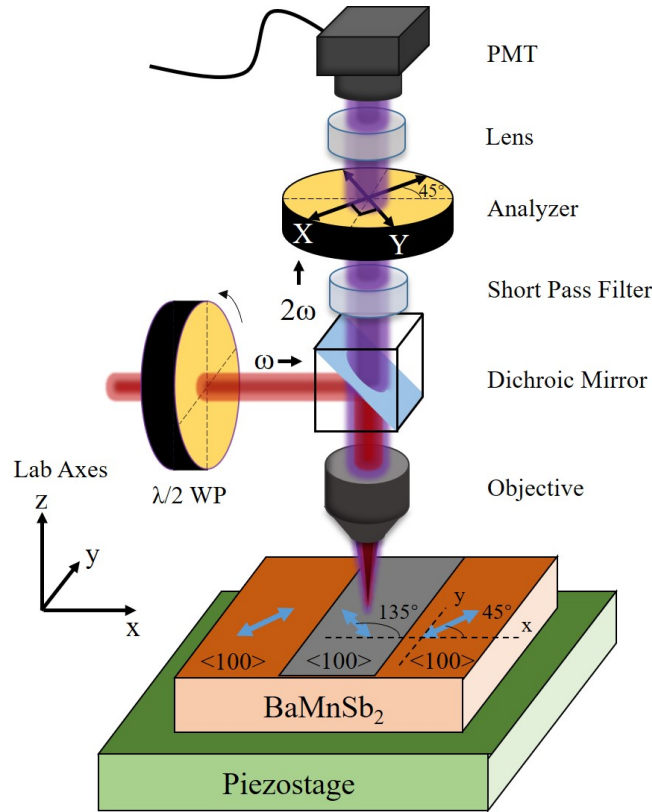

Supplementary Figure 2. Schematic of the SHG microscopy setup. For SHG imaging, images of (001) - cleaved  $\text{BaMnSb}_2$  were obtained at a resolution of 3 points per micrometer by moving piezostage. For polarimetry measurement, the polarization angle ( $\theta$ ) of the incident laser was continuously tuned from  $0^\circ$  to  $360^\circ$  by rotating the  $\lambda/2$  wave plate.

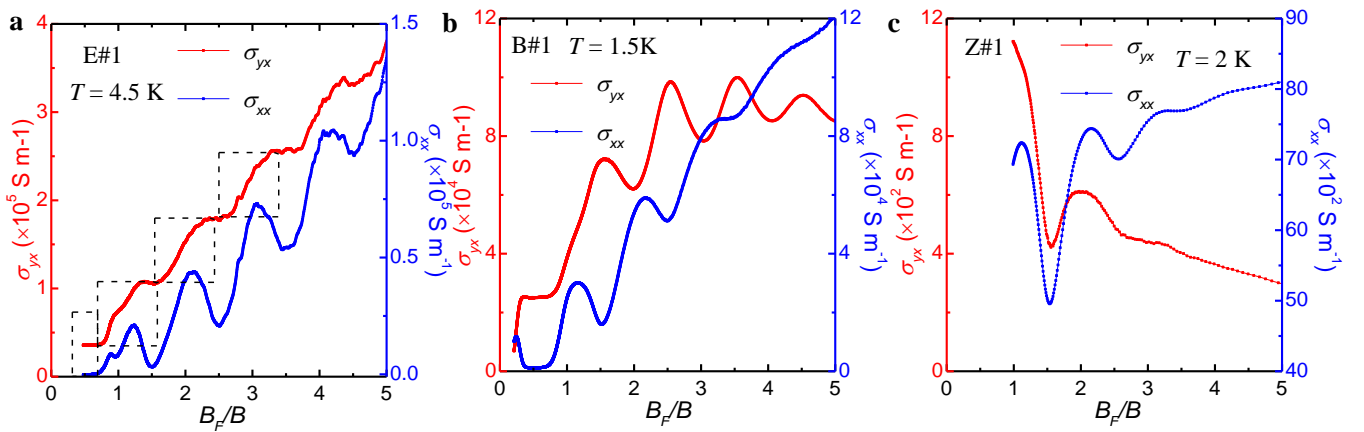

Supplementary Figure 3. Hall conductivity  $\sigma_{yx}$  and longitudinal conductivity  $\sigma_{xx}$  for samples E#1 (a), B#1 (b) and Z#1 (c). Both  $\sigma_{yx}$  and  $\sigma_{xx}$  are obtained from tensor conversions from  $\rho_{xx}$  and  $\rho_{xy}$ .

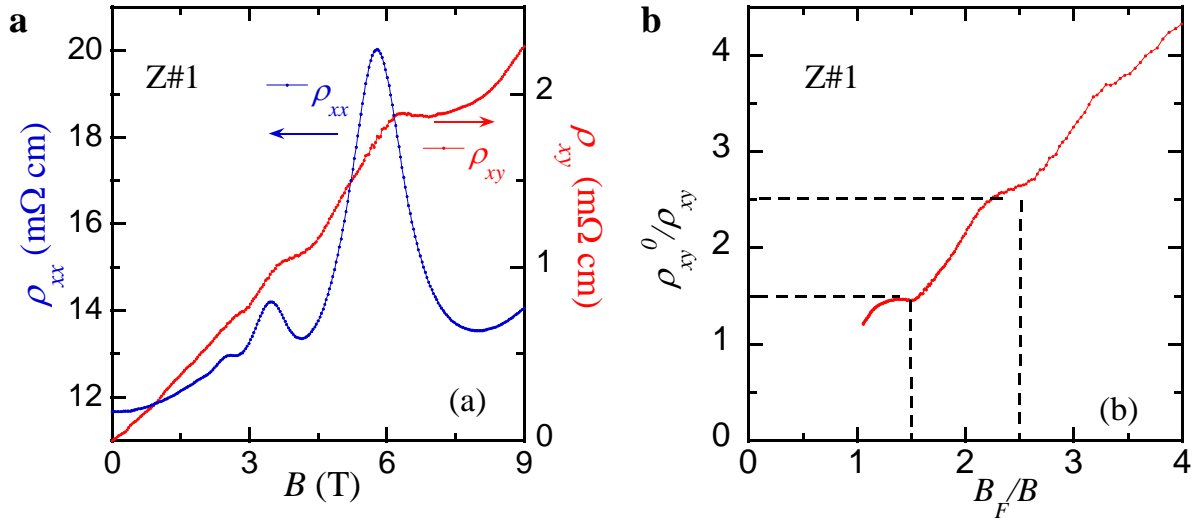

Supplementary Figure 4. QHE of sample Z#1. **a**, Magnetic field dependence of in-plane ( $\rho_{xx}$ ) and Hall ( $\rho_{xy}$ ) resistivity up to 9T at 2K. **b**, Normalized inverse Hall resistivity ( $\rho_{xy}^0/\rho_{xy}$ ) at 2K

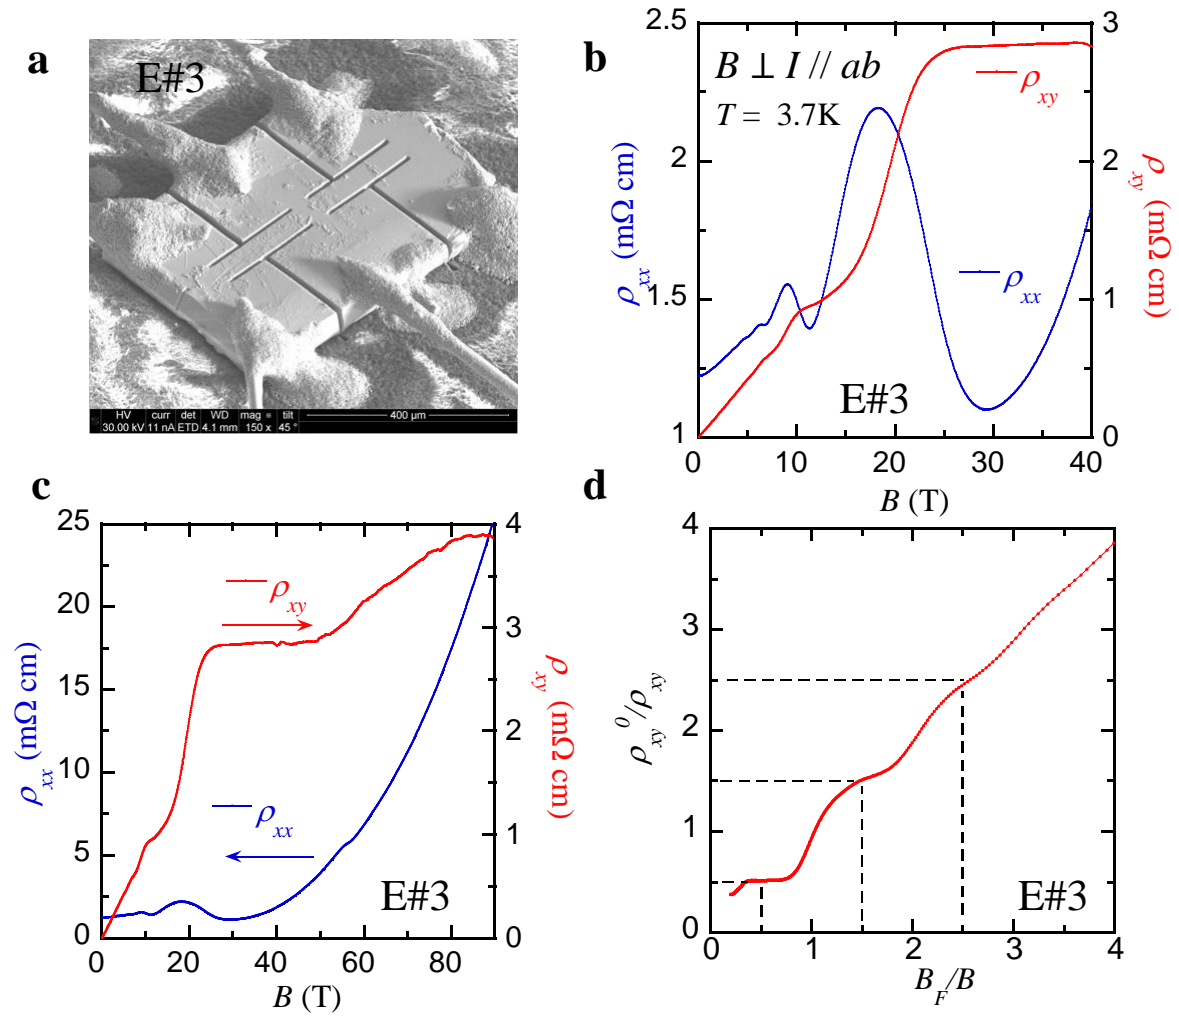

Supplementary Figure 5. QHE of sample E#3. **a**, SEM image of the Hall-bar sample E#3 fabricated by FIB. **b**, Magnetic field dependence of in-plane ( $\rho_{xx}$ ) and Hall ( $\rho_{xy}$ ) resistivity up to 40T at 3.7 K. **c**,  $\rho_{xx}$  and  $\rho_{xy}$  vs. magnetic field up to 90 T at 3.7K. **d**, Normalized inverse Hall resistivity ( $\rho_{xy}^0/\rho_{xy}$ ) at 3.7K.

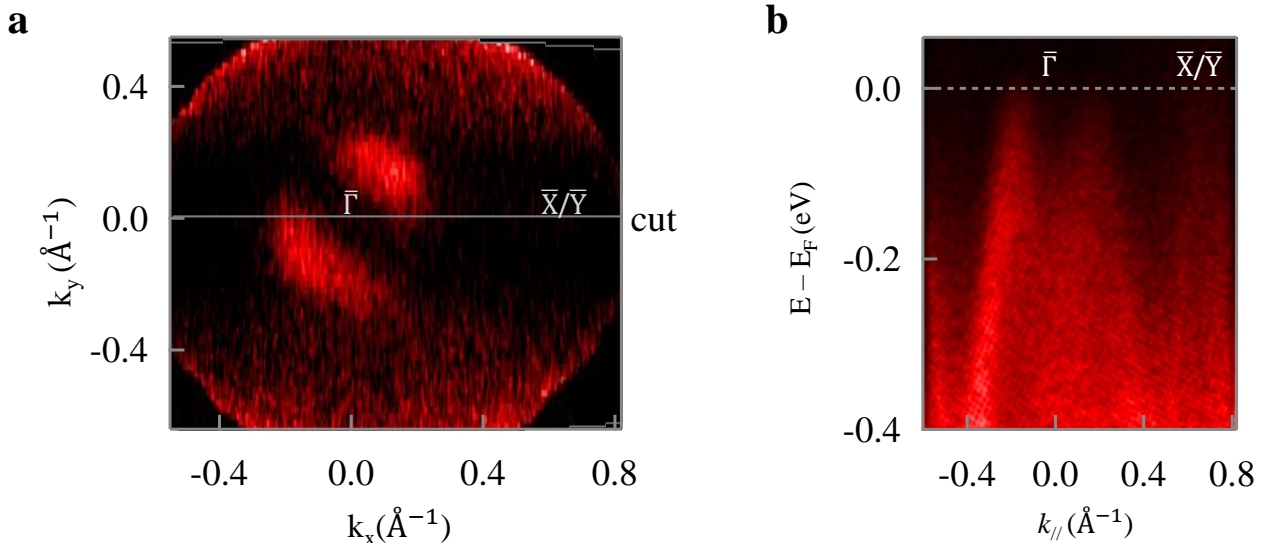

Supplementary Figure 6. a, Constant energy contour of  $\text{Ba}(\text{Mn}_{0.9}\text{Zn}_{0.1})\text{Sb}_2$  on the  $k_x - k_y$  plane, which is acquired by integrating from -15 meV to -5 meV. The ARPES data is taken with the photon energy of 25 eV. b, ARPES spectrum along the cut. There is a hole pocket crossing the Fermi level around the  $\bar{\Gamma}$  point.

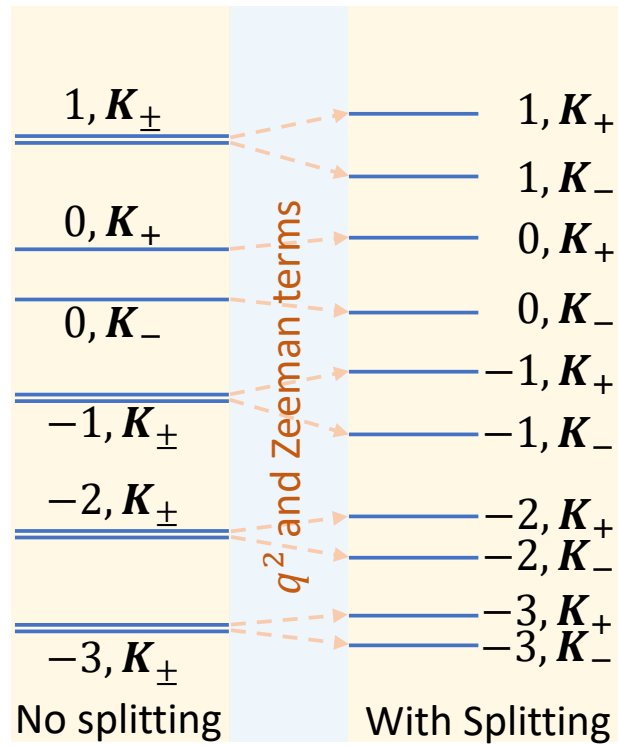

Supplementary Figure 7. Schematic illustration of the valley splitting due to the  $q$ -quadratic and Zeeman terms.

## I. SUPPLEMENTARY NOTES

### 1. Orthorhombic lattice distortion detected by neutron scattering

As mentioned in the main text, the crystal structure of BaMnSb<sub>2</sub> were reported to be tetragonal with a space group of  $I4/mmm$  in several studies [1–4]. In our previous work, we did neutron scattering measurements to determine the magnetic structure of BaMnSb<sub>2</sub> [1]. Based on 164 nuclear reflection peaks, the refinement of the crystal structure showed a roughly good fit using the tetragonal structural model. However, after a careful inspection of individual reflection peaks, we did find broadening in the diffraction spots at (200) and (020). The integrated intensity for (020) show noticeable peak splitting, as shown in supplementary Fig. 1. This suggests the real structure of BaMnSb<sub>2</sub> should involve an orthorhombic lattice distortion, which is further clarified by our STEM study (see text).

### 2. SHG polarimetry and Theoretical Modeling

SHG is a nonlinear optical process only shown in materials with non-centrosymmetric point groups, which is widely used in crystal symmetry study. In the process, light with a frequency of  $\omega$  is incident on a crystal, inducing an electromagnetic polarization with a frequency of  $2\omega$ . [5] The induced polarization  $P^{2\omega}$  can be expressed as,

$$P_i^{2\omega} = \varepsilon_0 \chi_{ijk} E_j^\omega E_k^\omega$$

where  $\chi_{ijk}$  is known as the second nonlinear optical susceptibility.

In Voigt notation,  $\chi_{ijk}$  can be simplified to a  $3 \times 6$  matrix  $d_{ij}$  ( $i=1,2,3; l=1,2,3,4,5,6$ ), where the index  $l=1,2,3,4,5,6$  in  $d_{ij}$  corresponds to  $jk=11,22,33,23/32,13/31,12/21$  in  $\chi_{ijk}$  respectively. Therefore, polarization  $P^{2\omega}$  can be written as,

$$\begin{pmatrix} P_1^{2\omega} \\ P_2^{2\omega} \\ P_3^{2\omega} \end{pmatrix} = \varepsilon_0 \begin{pmatrix} d_{11} & d_{12} & d_{13} & d_{14} & d_{15} & d_{16} \\ d_{21} & d_{22} & d_{23} & d_{24} & d_{25} & d_{26} \\ d_{31} & d_{32} & d_{33} & d_{34} & d_{35} & d_{36} \end{pmatrix} \begin{pmatrix} (E_1^\omega)^2 \\ (E_2^\omega)^2 \\ (E_3^\omega)^2 \\ 2E_2^\omega E_3^\omega \\ 2E_3^\omega E_1^\omega \\ 2E_1^\omega E_2^\omega \end{pmatrix}$$

From Neumann's principle, the SHG  $d$  matrix for the  $2mm$  symmetry, point group with 2-fold axis along with crystal  $a$ -axis, is

$$d_{ij} = \begin{pmatrix} d_{11} & d_{12} & d_{13} & 0 & 0 & 0 \\ 0 & 0 & 0 & 0 & 0 & d_{26} \\ 0 & 0 & 0 & 0 & d_{35} & 0 \end{pmatrix}$$

where polar in-plane  $a$ -axis is along direction given by subscript 1, in-plane  $b$  axis is along direction 2, and out-of-plane  $c$ -axis is 3. If instead, the polar  $a$ -axis is along the direction 2, then the  $d_{ij}$  will transform to

$$d'_{ij} = \begin{pmatrix} 0 & 0 & 0 & 0 & 0 & d_{26} \\ d_{12} & d_{11} & d_{13} & 0 & 0 & 0 \\ 0 & 0 & 0 & d_{35} & 0 & 0 \end{pmatrix}$$

For our experimental set up with normal incidence,  $E_1^\omega = E \cos \theta$ ,  $E_2^\omega = E \sin \theta$ ,  $E_3^\omega = 0$ . For simplicity, set  $E=1$ , then the SHG signal from each domain can be described by:

$$\begin{cases} I_X^{2\omega} = (P_X^{2\omega})^2 = (P_1^{2\omega})^2 = |d_{11}|^2 \cos^4 \theta + |d_{12}|^2 \sin^4 \theta + |d_{11}| |d_{12}| \cos^2 \theta \sin^2 \theta \\ I_Y^{2\omega} = (P_Y^{2\omega})^2 = (P_2^{2\omega})^2 = |d_{26}|^2 \sin^2(2\theta) \end{cases}$$

$$\begin{cases} I_X^{2\omega'} = (P_X^{2\omega'})^2 = (P_1^{2\omega'})^2 = |d_{26}|^2 \sin^2(2\theta) \\ I_Y^{2\omega'} = (P_Y^{2\omega'})^2 = (P_2^{2\omega'})^2 = |d_{12}|^2 \cos^4 \theta + |d_{11}|^2 \sin^4 \theta + |d_{11}| |d_{12}| \cos^2 \theta \sin^2 \theta \end{cases}$$

In our modeling of the twin domains in the experimental images shown in Figure 1, a simple single domain with tensor  $d_{ij}$ , and another adjacent twin domain with a tensor  $d_{ij}'$  does not provide the best fit to the polarimetry data shown in Figure 1. Since the domains are large (microns) relative to the beam size ( $\sim 180\text{nm}$ ), the polarimetry should have fit with single domain expressions given above. [6] Since they did not, we had to assume the presence of twin domains underneath the surface domains as follows:

$$\begin{cases} I_X^{2\omega}(\text{total}) = I_X^{2\omega} + k_1 \cdot I_X^{2\omega'} \\ I_Y^{2\omega}(\text{total}) = I_Y^{2\omega} + k_1 \cdot I_Y^{2\omega'} \end{cases}$$

$$\begin{cases} I_X^{2\omega}(\text{total})' = I_X^{2\omega'} + k_2 \cdot I_X^{2\omega} \\ I_Y^{2\omega}(\text{total})' = I_Y^{2\omega'} + k_2 \cdot I_Y^{2\omega} \end{cases}$$

where  $k_1$  and  $k_2$  is a coefficient described the proportion of intensity comes from the hidden domains. Such domains beneath the surface in a polar metal was also seen recently in another polar metal,  $\text{Ca}_3\text{Ru}_2\text{O}_7$ . [7] The equations above provided good fits to our experimental polarimetry data in Figure 1. Future cross-sectional TEM study of the exact area that was optically probed should provide a confirmation of the presence of such domains.

### 3. 2D electronic structure of $\text{BaMnSb}_2$

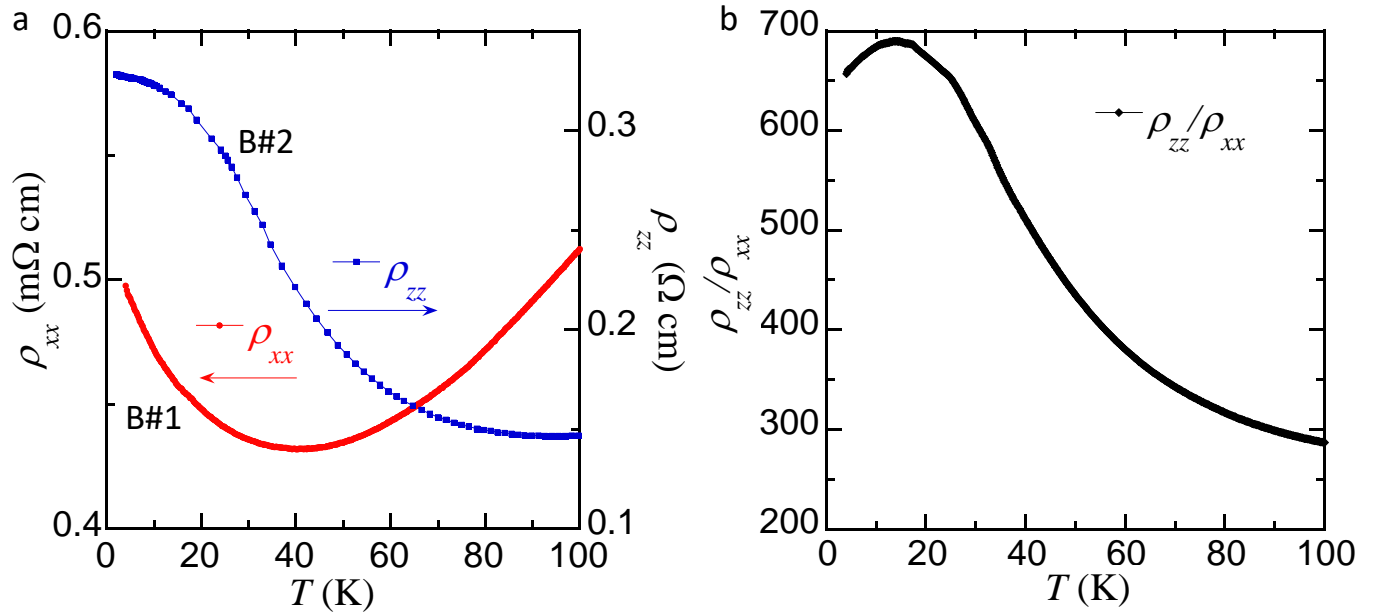

Supplementary Figure 8. Large anisotropic ratio in  $\text{BaMnSb}_2$ . (a) Temperature dependence of in-plane ( $\rho_{xx}$ ) and out-of-plane ( $\rho_{zz}$ ) resistivity. (b) Temperature dependence of anisotropic ratio  $\rho_{zz}/\rho_{xx}$ .



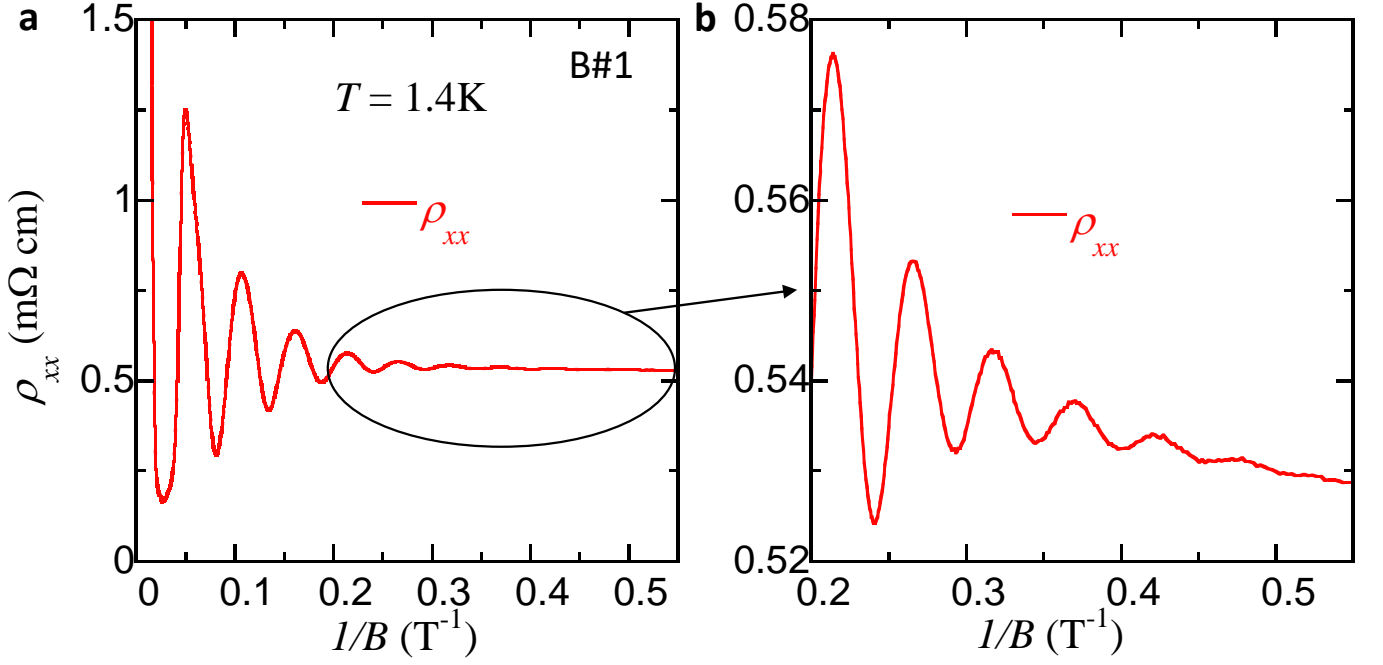

Supplementary Figure 9. (a) In-plane resistivity  $\rho_{xx}$  versus  $1/B$  for samples B#1 and (b) Zoom-in view for the low field range ( $0.2 \text{ T}^{-1} < 1/B < 0.55 \text{ T}^{-1}$ ) in (a).

The small  $k_z$ -dispersion in electronic band structure (Fig. 2a, main text) suggests a quasi-2D electronic state in BaMnSb<sub>2</sub>. This is further supported by the quantum oscillation studies. A perfectly 2D electronic state is characterized by straight cylindrical Fermi surface, while in a layered material with large anisotropic ratio  $\rho_{zz}/\rho_{xx}$ , which is the case for BaMnSb<sub>2</sub> (supplementary Fig. 8), a quasi-2D state with corrugated cylindrical Fermi surface is expected. With magnetic field being applied perpendicular to the plane direction (i.e., along the FS cylinder), there exist both minimum and maximum FS cross-sections perpendicular to magnetic field, leading to multiple frequencies in quantum oscillations. Given these frequencies are not far from each other, the interference of these oscillation components leads to oscillation beating like pattern, which has been observed in quantum oscillation of  $\rho_{xx}$  in sample B#1. As shown in supplementary Fig. 9, the oscillating amplitude continuously increases as the  $1/B$  decreases in the range of  $[0.05\text{T}^{-1}, 0.5\text{T}^{-1}]$ , which indicates the beating frequency is

$$F_{\text{beating}} < 1/[2 \times (0.5 - 0.05)] = 1.1\text{T} . \quad (1)$$

Assuming there are two frequency components ( $F_1$  and  $F_2$ ) due to FS corrugation, the frequency difference can be estimated by:

$$\Delta F = F_1 - F_2 = F_{\text{beating}} < 1.1\text{T} . \quad (2)$$

Compared with the average oscillation frequency of 18.83T obtained from the FFT of the oscillation pattern, the relative corrugation is as small as  $\Delta F/F < 6\%$ . This indicates that FS is nearly a straight cylinder, demonstrating the nearly perfect 2D electronic structure of BaMnSb<sub>2</sub>.

#### 4. Tunneling mechanism for interlayer transport

Institively, the large anisotropic ratio  $\rho_{zz}/\rho_{xx}$  (supplementary Fig. 8) implies a tunneling mechanism for interlayer (out-of-plane) transport in layered BaMnSb<sub>2</sub>. More solid evidence for interlayer tunneling can be found in the in-phase oscillations of in-plane ( $\sigma_{xx}$ ) and out-of-plane ( $\sigma_{zz}$ ) conductivities. supplementary Fig. 10 presents the field dependence of conductivity for samples B#2 and E#2.  $\sigma_{xx}$  was obtained from the 2D resistivity tensor inversion, while  $\sigma_{zz}$  should be derived from the 3D resistivity tensor inversion [8]:

$$\sigma_{zz} = \frac{\rho_{xx}\rho_{yy} - \rho_{xy}\rho_{yx}}{\rho_{xx}\rho_{yy}\rho_{zz} - \rho_{xy}\rho_{yx}\rho_{zz} - \rho_{xz}\rho_{zx}\rho_{yy}} . \quad (3)$$

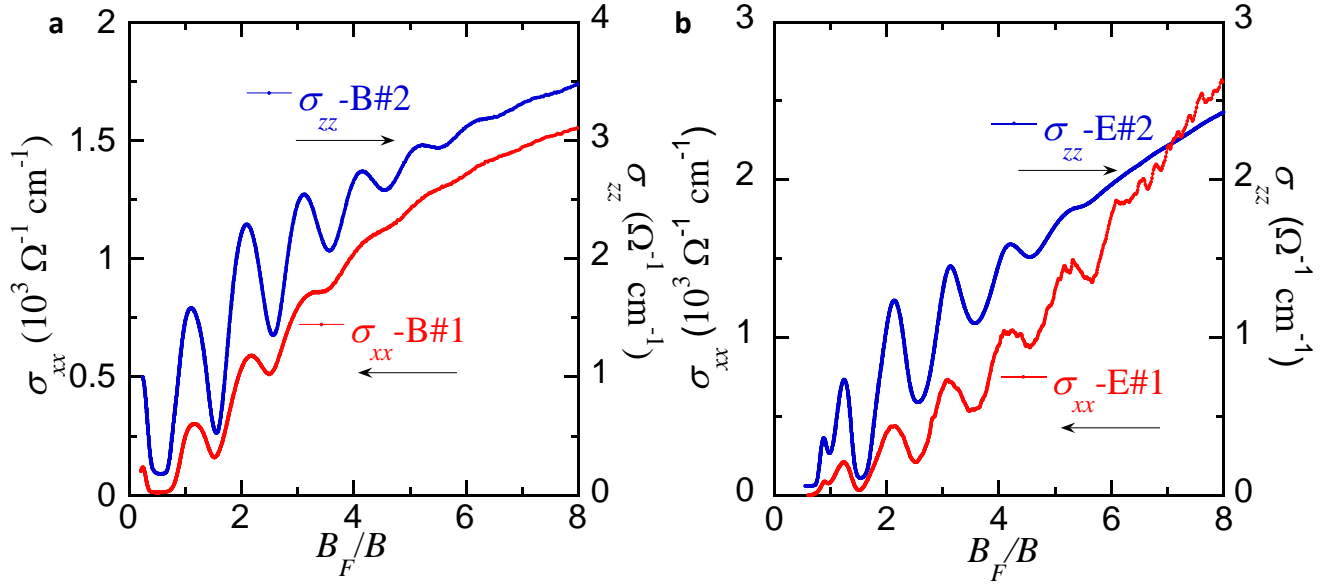

Supplementary Figure 10. In-plane ( $\sigma_{xx}$ ) and out-of-plane ( $\sigma_{zz}$ ) conductivities for samples B#1 and B#2 (a) and samples E#1 and E#2 (b).

Given  $\rho_{zz} \gg \rho_{xx} = \rho_{yy}$ , and  $\rho_{xz} = \rho_{yz} = 0$  when magnetic field is along the  $z$ -axis, the above equation approximates to  $\sigma_{zz} \approx 1/\rho_{zz}$ .

In 3D QHE, the in-plane transport exhibits QHE behavior but the out-of-plane transport does not. For the in-plane transport, the nearly zero  $\sigma_{xx}$  plateau at high fields is indeed the signature of non-local transport of QHE, which corresponds to the situation that the Fermi level ( $E_F$ ) resides in between Landau levels (LLs) (i.e.,  $\text{DOS}(E_F)$  achieves a minimum).

For the out-of-plane transport, if the transport is due to the momentum relaxation (i.e., non-tunneling),  $\sigma_{zz}$  should reach a maximum at a minimum  $\text{DOS}(E_F)$  according to the quantum oscillation theory [9–12]. The earlier transport theory has established that the scattering probability ( $1/\tau$ ) is proportional to the number of available states that electron can be scattered into, so  $1/\tau$  oscillates in concert with the oscillations of  $\text{DOS}(E_F)$ [9–12]. Hence,  $\sigma \propto \tau \propto 1/\text{DOS}(E_F)$ , which has been experimentally observed [13]. This is inconsistent with the observation that  $\sigma_{zz}$  reaches a minimum at the  $\sigma_{xx}$  plateau (i.e., at  $\text{DOS}(E_F)$  minimum, supplementary Fig. 10a and 10b). On the other hand, the tunneling current should be proportional to  $\text{DOS}(E_F)$ , so the tunneling conductivity  $\sigma \propto \text{DOS}(E_F)$ . This is exactly what have been observed. In the quantum Hall state within the quantum limit, the gap between Landau levels is significantly increased, which minimizes the interlayer tunneling. In this case, the  $z$ -axis transport is dominated by the 2D chiral surface state, which is manifested by the saturation tendency of  $\rho_{zz}$  below 20K (Fig. 4c in the main text),

## 5. Transport measurements on sample E#1

The E#1 Hall-bar sample was also prepared through focused ion beam (FIB) cutting. supplementary Fig. 11a shows the optical image of this sample. During cooling-down for pulse field measurements on this sample, leads #2 and 4 broke, so we had to use leads #3 and #6 to measure both  $\rho_{xy}$  and  $\rho_{xx}$ . supplementary Fig. 11b presents the raw data of the voltage measured between leads #3 and #6,  $V_{3,6}$ . Although leads #3 and #6 are significantly misaligned,  $V_{3,6}$  show a remarkable asymmetric feature between positive and negative magnetic fields, indicating  $V_{3,6}$  is dominated by the Hall voltage  $V_{xy}$  and the longitudinal voltage  $V_{xx}$  is small. supplementary Fig. 11c shows  $V_{xx}$  and  $V_{xy}$  data obtained through symmetrizing and anti-symmetrizing of the  $V_{3,6}$  data acquired under positive and negative magnetic fields. The  $V_{xy}$  plateaus are found to be accompanied by the  $V_{xx}$  minima, a typical signature of QHE. The small negative  $V_{xx}$  above 47.5T can be attributed to the fact that symmetrizing  $V_{3,6}$  between positive and negative fields cannot completely remove the Hall voltage component, which is often seen in Hall effect measurements where the longitudinal and Hall resistivities are mixed. The anti-symmetrizing process of  $V_{3,6}$  may also not completely remove  $V_{xx}$  from  $V_{xy}$ , but the perfect  $V_{xy}$  plateau near 50T (supplementary Fig. 11c) indicates the  $\rho_{xx}$  at this quantum Hall state is extremely small. The longitudinal conductivity  $\sigma_{xx}$  for this quantum Hall state is indeed close to zero, as shown in Fig. 4d in the main text. The observations of  $\sigma_{yx}$  equal steps in sample E#1 (Fig. S3a), together with its

very small  $\rho_{xx}$  (Fig. 4a) and nearly zero  $\sigma_{xx}$  at the quantum Hall state within the quantum limit (Fig. 4d), suggests its stacked QHE is nearly perfect; that is, almost every 2D Sb conducting layer acts as a quantum Hall layer.

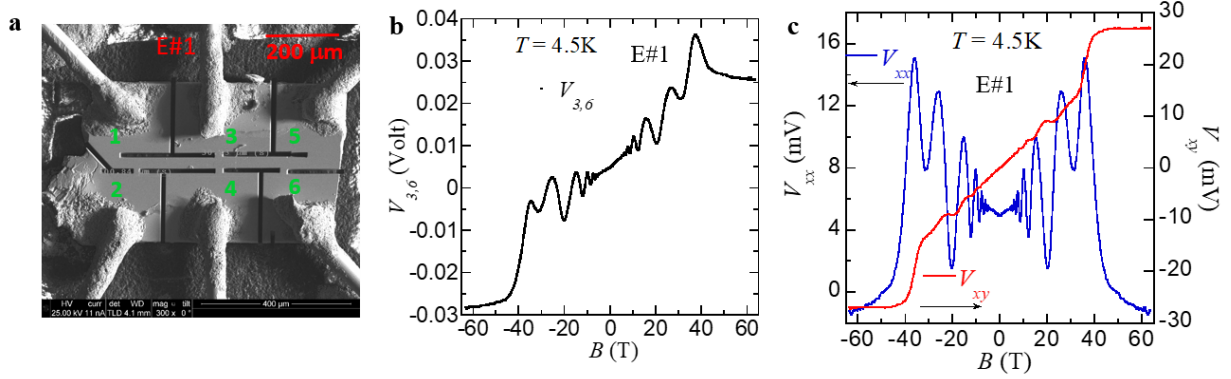

Supplementary Figure 11. **a**, The SEM image of the Eu-doped BaMnSb<sub>2</sub> sample (E#1). **b**, The field dependence of the voltage between leads 3 and 6 ( $V_{3,6}$ ) for sample E#1 at 4.5K. **c**, The Hall voltage  $V_{xy}$  and longitudinal voltage  $V_{xx}$  obtained via anti-symmetrizing and symmetrizing the  $V_{3,6}$  data respectively.

## 6. Zeeman Effect of BaMnSb<sub>2</sub>

To evaluate the Zeeman effect in BaMnSb<sub>2</sub>, we have recently measured the angular dependence of the Shubnikov-de Haas (SdH) oscillations in interlayer resistance  $R_{ZZ}$  for a Eu-doped sample (supplementary Fig. 12a). For such measurements, if the g-factor of the material is large, we would expect to observe the SdH oscillations are modulated by the tilt angle  $\theta$  of magnetic field: the oscillation amplitude varies with  $\theta$  and decreases to zero at a critical angle  $\theta_c$ , above which the SdH oscillations exhibits a phase inversion. This is an approach often used to determine the g-factor for layered materials and known as the spin-zero method [14]. For instance, this method was recently used to determine the g-factor of EuMnBi<sub>2</sub> [15]. The critical angle  $\theta_c$  was found be  $\sim 40^\circ$  for EuMnBi<sub>2</sub> and the g-factor estimated using the relation  $\cos\theta_c = gm_c/m_0$  ( $m_c$ , cyclotron mass;  $m_0$ , free electron mass) is 9.8(4).

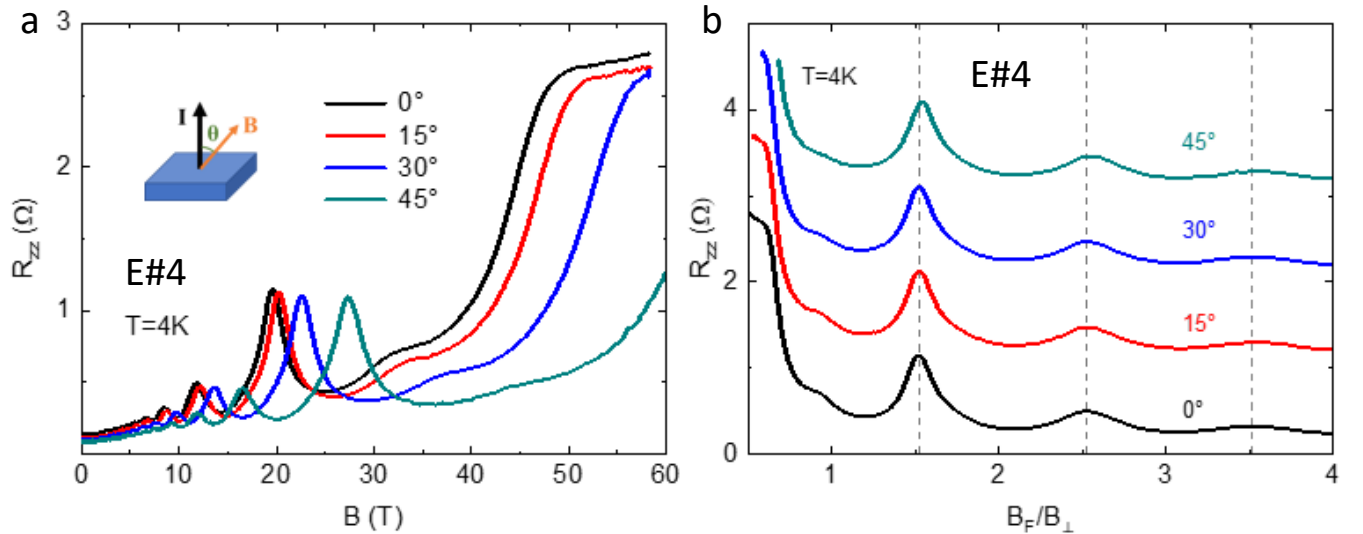

Supplementary Figure 12. (a) The out-of-plane resistance  $R_{zz}$  of a Eu<sub>0.1</sub>Ba<sub>0.9</sub>MnSb<sub>2</sub> sample (E#4) as a function of magnetic field under various field orientations. (b)  $R_{zz}$  vs.  $B_F/B_\perp$  for sample E#4;  $B_F$  and  $B_\perp$  refer to the SdH oscillation frequency and the perpendicular component of the magnetic field along the  $z$ -axis. The data in panel b are offset for clarity.

As shown in supplementary Fig. 12(b) where  $R_{ZZ}$  is plotted on the scale of  $B_F/B_\perp$  ( $B_F$ , the SdH oscillation

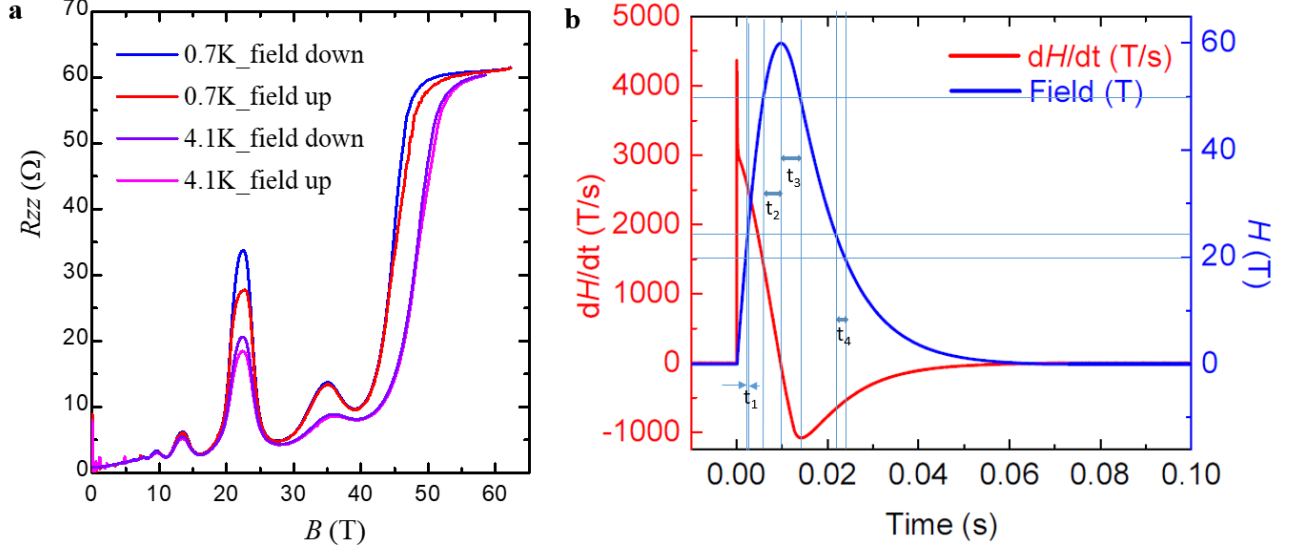

Supplementary Figure 13. **a**, The z-axis resistance  $R_{zz}$  measured in the up- (red/purple) and down-field (blue) sweeps for sample E#2 at 0.7 K and 4.1 K. **b**, The variation of pulse field with time and the derivative (red) of the field relative to time.  $t_1$  ( $t_4$ ) represents the time period for the field increasing (decreasing) from 20T (25T) to 25 T (20T).  $t_2$  and  $t_3$  represent the time periods of the field sweep from 50T to 60T and then from 60T to 50T respectively.

frequency;  $B_{\perp}$ , the perpendicular component of the magnetic field along the z-axis), we do not observe the expected spin-zero phenomena in  $\text{BaMnSb}_2$ , i.e. zero oscillation amplitude and phase inversion even when the tilt angle is increased to  $45^\circ$ . Instead, the oscillation amplitude and phase exhibit very small changes with the increase of  $\theta$ , indicating that the g-factor of  $\text{BaMnSb}_2$  is small, probably close to 2. Considering Sb is much lighter than Bi, it is reasonable to see  $\text{BaMnSb}_2$  has a much smaller g factor than  $\text{EuMnBi}_2$ .

If we attributed the observed SdH oscillation peak splitting in  $\rho_{xx}$  (Fig. 4a in the main text) to the Zeeman effect, the g-factor would be estimated to  $\sim 12.6$  using  $F(\frac{1}{B_+} - \frac{1}{B_-}) = (\frac{1}{2})g(m_c/m_0)$  ( $F$ , oscillation frequency;  $\frac{1}{B_+}$  and  $\frac{1}{B_-}$  refer to the inverse fields of the split peaks) [16]. This is clearly not reasonable, since the g value of 12.6 should lead to the remarkable variation of oscillation amplitude and phase with the increase of  $\theta$ , as seen in  $\text{EuMnBi}_2$ , which is not observed in our experiments. This indicates the observed oscillation peak splitting in  $\rho_{xx}$  or the valley splitting in  $\rho_{zz}$  should mostly originate from the orbital effect.

## 7. Possible origins of the z-axis resistance plateau in the quantum Hall state

The plateau in the z-axis resistance  $R_{zz}$  near 50T of sample E#2 (Fig. 4b) is a robust feature of the quantum Hall state within the quantum limit, that does not come from either joule heating or trivial surface states due to band bending as explained below. We can evaluate the heating effect by comparing the upward and downward field sweep measurements. supplementary Fig. 13b shows how the pulse field H varies with time t in upward and downward field sweeps as well as  $dH/dt$  (red curve). We present the comparison of  $R_{zz}$  measured in the up- and down-field sweeps in supplementary Fig. 13a, from which we can see the  $R_{zz}$  peak in the 20-25T range exhibits a striking difference between up- and down-field sweeps. In the main text, we have shown the  $\gamma = 3/2 \rho_{xy}$  plateau occurs within the 20-25T range (Fig. 4a and 4b). The difference of the  $R_{zz}$  peak height between the up- and down-field sweeps within this quantum Hall state should arise from heating effect. In the up-field sweep, the field increase from 20T to 25T takes an extremely short period of time  $t_1$  (see supplementary Fig. 13b), such that the heat generated by the field sweep and measurements cannot be dissipated effectively. In contrast, the field decrease from 25T to 20T in the down-field sweep takes much longer time ( $t_4 \approx 5t_1$ , see supplementary Fig. 13b) so that the heating effect can be suppressed, which explains the enhanced  $R_{zz}$  peak probed in down-field sweep. However, the heating effect for the quantum Hall state within the quantum limit ( $B > 50\text{T}$ ) becomes much weaker, because the  $R_{zz}$  probed above 50T shows much smaller

difference between up- and down-field sweeps (supplementary Fig. 13a). The time for the field increasing from 50T to 60T ( $t_2$ ) and the time for the field decreasing from 60T to 50T ( $t_3$ ) are much longer than  $t_1$  and  $t_4$  (see supplementary Fig. 13b), thus the heat generated by magnetic field sweeps and measurements within these time periods is expected to be small. Furthermore, we did similar up- and down-sweep measurements at 4.1 K and found the hysteresis of  $R_{zz}$  due to the heating effect is significantly suppressed for the quantum Hall state at 20-25T, and extremely small for the quantum Hall state near 50T. More importantly, the  $R_{zz}$  values at 4.1 K and 0.7K are nearly identical for fields close to 60T. If the  $R_{zz}$  plateau was due to heating effect, we would expect the  $R_{zz}$  value near 60T to decrease as the temperature increases to 4.1K, inconsistent with the observation of nearly identical  $R_{zz}$  at 0.7 K and 4.1K for fields approaching 60T. The evolution trend of the  $R_{zz}$  plateau from 0.7K to 4.1K also implies that the  $R_{zz}$  plateau should become more flattened as the temperature is further decreased below 0.7K. All these facts indicate that the  $R_{zz}$  plateau at the quantum Hall state within the quantum limit should be intrinsic and implies the presence of 2D chiral surface state as discussed in the main text.

Given the Dirac cones near the X point is gapped and the gap magnitude is small ( $\sim 50$  meV), one may wonder the  $R_{zz}$  plateau is associated with the surface accumulation layers due to band bending. Such a possibility can be excluded for the following reasons: If trivial accumulation layers existed in BaMnSb<sub>2</sub>, they would be present at the top and bottom surfaces along the z-direction, thus not contributing to the z-axis transport. On the other hand, if we assume the z-axis transport was associated with the trivial surface state, the SdH oscillations seen in  $R_{zz}$  would not be coupled to the bulk quantum Hall state, which clearly contradicts our experimental observation of  $R_{zz}$  reaching a plateau at the  $\rho_{xy}$  plateaus. As discussed in the main text, the SdH oscillations of  $R_{zz}$  and  $\rho_{xx}$  have the nearly same oscillation frequency for the samples taken from the same batch and the carrier densities extracted from the Hall coefficient and quantum oscillation frequency are consistent. These facts further indicate the trivial surface states due to band bending are not involved in BaMnSb<sub>2</sub>.

## II. SUPPLEMENTARY DISCUSSIONS

### Tight-Binding Models

We first construct the TB models for the Sb layer, and study the evolution of the band in comparison with the first-principles calculation.

The orbital projection given by the first principles calculation (supplementary Figs. 15, 16 and 17) shows that the main contributions to the band near the Fermi level (slightly below zero energy) are from  $p_x$  and  $p_y$  orbitals of Sb atoms on the conducting Sb layers as discussed in the main text. Since the inter-layer tunneling is negligible as shown by the small bandwidth along  $\Gamma - Z$  near the Fermi energy in Fig. 2(a) of the main text, we can construct the TB model only for one of the two equivalent conducting Sb layers in the conventional cell without any inter-layer tunneling along  $z$  direction. In the chosen conducting Sb layer (Fig 1(b) of the main text or supplementary Fig. 14), the two Sb atoms in one unit cell, labeled as Sb1 and Sb2, have sub-lattice vectors  $\boldsymbol{\tau}_1 = (x_1a, 0, c/2)$  and  $\boldsymbol{\tau}_2 = (x_2a, b/2, c/2)$ , respectively, where  $a, b, c$  are the lattice constants of the conventional cell in  $x, y, z$  direction and  $x_{1,2} \in [0, 1)$  and the values of  $x_{1,2}$  will be given for different symmetry groups ( $I4/mmm$  or  $I2mm$ ). Therefore, the bases of the TB model are  $|\mathbf{R} + \boldsymbol{\tau}_i, \alpha, s\rangle$  with the lattice vector  $\mathbf{R} = (l_xa, l_yb, l_zc)$  ( $l_{x,y,z} \in \mathbb{Z}$ ), the sublattice index  $i = 1, 2$ , the orbital index  $\alpha = p_x, p_y$  and the spin- $z$  index  $s = \uparrow, \downarrow$ . We include the on-site term  $H_0$ , the nearest-neighboring (NN) hopping  $H_1$  and the next-NN hopping  $H_2$  in the TB model, *i.e.*  $H_{TB} = H_0 + H_1 + H_2$ . Specifically,  $H_0$  reads

$$H_0 = \sum_{\mathbf{R}, i} c_{\mathbf{R}+\boldsymbol{\tau}_i}^\dagger M_i c_{\mathbf{R}+\boldsymbol{\tau}_i} , \quad (4)$$

where  $c_{\mathbf{R}+\boldsymbol{\tau}_i}^\dagger = (c_{\mathbf{R}+\boldsymbol{\tau}_i, p_x, \uparrow}^\dagger, c_{\mathbf{R}+\boldsymbol{\tau}_i, p_x, \downarrow}^\dagger, c_{\mathbf{R}+\boldsymbol{\tau}_i, p_y, \uparrow}^\dagger, c_{\mathbf{R}+\boldsymbol{\tau}_i, p_y, \downarrow}^\dagger)$ .  $H_1$  reads

$$H_1 = \sum_{\mathbf{R}} \sum_{n=1}^4 c_{\mathbf{R}+\Delta\mathbf{R}_n+\boldsymbol{\tau}_2}^\dagger T_n c_{\mathbf{R}+\boldsymbol{\tau}_1} + h.c. , \quad (5)$$

where  $\Delta\mathbf{R}_1 = 0$ ,  $\Delta\mathbf{R}_2 = (a, 0, 0)$ ,  $\Delta\mathbf{R}_3 = (a, -b, 0)$  and  $\Delta\mathbf{R}_4 = (0, -b, 0)$ .  $H_2$  reads

$$H_2 = \sum_{\mathbf{R}, i} \sum_{n=x, y} c_{\mathbf{R}+\Delta\mathbf{R}_n+\boldsymbol{\tau}_i}^\dagger Q_{ni} c_{\mathbf{R}+\boldsymbol{\tau}_i} + h.c. , \quad (6)$$

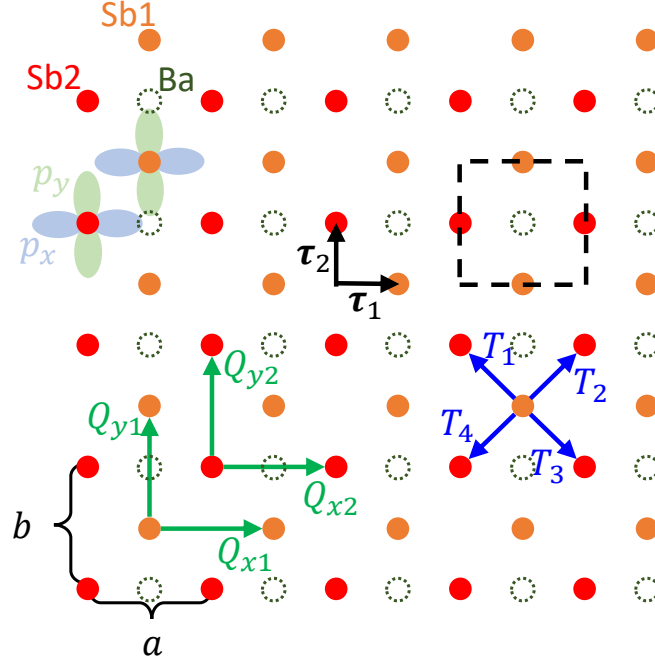

Supplementary Figure 14. This figure shows the positions of atoms, orbitals and the hopping. The red and orange atoms are Sb1 and Sb2, respectively, and the dark green dashed circles are the projection of nearby Ba atoms onto the Sb layer. The  $p_x$  and  $p_y$  orbitals of Sb atoms are labelled with light purple and light green colors, respectively. The black dashed line boxes the unit cell and the black arrows are the sublattice vectors  $\tau_1$  and  $\tau_2$ . The blue and green arrows show the NN and next-NN hopping, respectively.  $a$  and  $b$  are lattice constants along  $x$  and  $y$  directions, respectively.

where  $\Delta \mathbf{R}_x = (a, 0, 0)$  and  $\Delta \mathbf{R}_y = (0, b, 0)$ . (See more details about the hopping in supplementary Fig. 14.) Using  $c_{\mathbf{R}+\tau_i}^\dagger = \frac{1}{\sqrt{N'}} \sum_{\mathbf{k}} e^{-i\mathbf{k}\cdot(\mathbf{R}+\tau_i)} c_{\mathbf{k},i}^\dagger$  with  $N'$  the number of lattice sites and  $c_{\mathbf{k}}^\dagger = (c_{\mathbf{k},1}^\dagger, c_{\mathbf{k},2}^\dagger)$ , we can transform  $H_{TB}$  to the momentum space, which reads

$$H_{TB} = \sum_{\mathbf{k}} c_{\mathbf{k}}^\dagger h(\mathbf{k}) c_{\mathbf{k}}, \quad (7)$$

where  $h(\mathbf{k}) = h_0(\mathbf{k}) + h_1(\mathbf{k}) + h_2(\mathbf{k})$ ,

$$h_0(\mathbf{k}) = \begin{pmatrix} M_1 & \\ & M_2 \end{pmatrix}, \quad (8)$$

$$h_1(\mathbf{k}) = \begin{pmatrix} 0 & 0 \\ e^{-i[k_x a(x_2-x_1)+k_y b/2]} & 0 \end{pmatrix} \otimes [T_1 + T_2 e^{-ik_x a} + T_3 e^{-i(k_x a - k_y b)} + T_4 e^{ik_y b}] + h.c., \quad (9)$$

$$h_2(\mathbf{k}) = \begin{pmatrix} Q_{x1} & \\ & Q_{x2} \end{pmatrix} e^{-ik_x a} + \begin{pmatrix} Q_{y1} & \\ & Q_{y2} \end{pmatrix} e^{-ik_y b} + h.c.. \quad (10)$$

As shown by the above equations, the TB model has no  $k_z$  dependence, coinciding with the fact that we do not include any inter-layer tunneling. Therefore, in the following, we only need to consider the  $k_z = 0$  plane of the momentum space and redefine  $\mathbf{k} = (k_x, k_y)$ .

Before deriving the explicit forms of the terms in  $H_{TB}$ , let us first discuss the effect of anti-ferromagnetism (AFM). BaMnSb<sub>2</sub> has AFM with magnetic moments given by Mn atoms; such AFM structure can break some crystalline symmetries and the time-reversal (TR) symmetry. As discussed in the main text and above, the transport properties

of BaMnSb<sub>2</sub> are given by the conducting Sb layers, and the inter-layer tunneling, which passes through the Mn layer, is very small, implying the small effect of AFM on the transport. As shown in Fig. 2(a) of the main text, the negligible AFM effect is also reflected by the approximate 4-fold degeneracy near Fermi energy at  $X$ , since if the inter-layer tunneling and AFM are completely absent, the 4-fold degeneracy would become exact and come from the TR-protected Kramer's degeneracy in each of the two equivalent conducting Sb layers in one conventional cell. Therefore, we can construct the TB model without the AFM effect.

In the following, we first derive the forms of the terms in  $H_{TB}$  for the case where the system has no distortion and its space group is  $I4/mmm$ , and then consider the case where the zig-zag distortion reduces the space group to  $I2mm$ .

In this part, we first construct the TB model based on the symmetry property of the space group  $I4/mmm$  and then compare the TB model with the first-principles calculations.

Owing to  $I4/mmm$ , we have  $a = b$ , and  $(x_1, x_2) = (1/2, 0)$  for the chosen Sb layer. The generators of  $I4/mmm$  are the four-fold rotation  $C_{4z}$  along  $z$ , two-fold rotation  $C_{2y}$  along  $y$ , inversion  $P$  and translation  $T_{1/2}$  along  $(a/2, b/2, c/2)$ . As we neglect the AFM effect, we also have TR symmetry  $\mathcal{T}$ .  $T_{1/2}$  relates the two conducting Sb layers in the conventional cell and just gives rise to the layer double degeneracy if neglecting the inter-layer tunneling. Therefore, we only need to consider  $C_{4z}$ ,  $C_{2y}$ ,  $P$  and  $\mathcal{T}$  since we only construct the model for one conducting Sb layer in the conventional cell. The transformations of  $c_{\mathbf{R}+\boldsymbol{\tau}_i}^\dagger$  under those symmetries are

$$\begin{aligned} C_{4z} c_{\mathbf{R}+\boldsymbol{\tau}_i}^\dagger C_{4z}^{-1} &= c_{C_{4z}(\mathbf{R}+\boldsymbol{\tau}_i)}^\dagger C_{4z}^{OS} \\ C_{2y} c_{\mathbf{R}+\boldsymbol{\tau}_i}^\dagger C_{2y}^{-1} &= c_{C_{2y}(\mathbf{R}+\boldsymbol{\tau}_i)}^\dagger C_{2y}^{OS} \\ P c_{\mathbf{R}+\boldsymbol{\tau}_i}^\dagger P^{-1} &= c_{-(\mathbf{R}+\boldsymbol{\tau}_i)}^\dagger P^{OS} \\ \mathcal{T} c_{\mathbf{R}+\boldsymbol{\tau}_i}^\dagger \mathcal{T}^{-1} &= c_{\mathbf{R}+\boldsymbol{\tau}_i}^\dagger \mathcal{T}^{OS}, \end{aligned} \quad (11)$$

where  $C_{4z}^{OS} = (-i\tau_y)e^{-i\frac{\sigma_z}{2}\frac{\pi}{2}}$ ,  $C_{2y}^{OS} = i\tau_z\sigma_y$ ,  $P^{OS} = -\tau_0\sigma_0$ ,  $\mathcal{T}^{OS} = i\tau_0\sigma_y$ ,  $\mathcal{T}$  is anti-linear,  $OS$  means the combination of orbital and spin, and  $\tau$ 's and  $\sigma$ 's are Pauli matrices for orbital and spin indexes, respectively. Furthermore, the transformations of  $c_{\mathbf{k}}^\dagger$  reads

$$\begin{aligned} C_{4z} c_{\mathbf{k}}^\dagger C_{4z}^{-1} &= c_{C_{4z}\mathbf{k}}^\dagger \rho_x (-i\tau_y) e^{-i\frac{\sigma_z}{2}\frac{\pi}{2}} \\ C_{2y} c_{\mathbf{k}}^\dagger C_{2y}^{-1} &= c_{C_{2y}\mathbf{k}}^\dagger i\rho_0 \tau_z \sigma_y \\ P c_{\mathbf{k}}^\dagger P^{-1} &= c_{-\mathbf{k}}^\dagger (-\rho_0 \tau_0 \sigma_0) \\ \mathcal{T} c_{\mathbf{k}}^\dagger \mathcal{T}^{-1} &= c_{-\mathbf{k}}^\dagger i\rho_0 \tau_0 \sigma_y, \end{aligned} \quad (12)$$

where  $\rho$ 's are Pauli matrices for the sublattice index. The TB Hamiltonian  $H_{TB}$  must be invariant under  $C_{4z}$ ,  $C_{2y}$ ,  $P$  and  $\mathcal{T}$ , and thus we have the following forms for the terms in  $H_{TB}$  according to Eq. (11) (or equivalently Eq. (12)):

$$\begin{aligned} M_1 &= \tilde{m}_0 \tau_0 \sigma_0 + \tilde{m}_1 \tau_z \sigma_0 + \lambda_0 \tau_y \sigma_z, \quad M_2 = C_{4z}^{OS} M_1 (C_{4z}^{OS})^\dagger, \\ T_1 &= T_3 = t_0 \tau_0 \sigma_0 + t_1 \tau_x \sigma_0 + it_2 \tau_y \sigma_0, \quad T_4 = T_2 = \tau_z \sigma_y T_1 \tau_z \sigma_y, \\ Q_{x1} &= t_3 \tau_0 \sigma_0 + t_4 \tau_z \sigma_0, \quad Q_{x2} = t_5 \tau_0 \sigma_0 + t_6 \tau_z \sigma_0, \quad Q_{y1} = C_{4z}^{OS} Q_{x2} (C_{4z}^{OS})^\dagger, \quad Q_{y2} = C_{4z}^{OS} Q_{x1} (C_{4z}^{OS})^\dagger, \end{aligned} \quad (13)$$

where all  $\tilde{m}$ 's,  $t$ 's and  $\lambda_0$  are real and the spin-dependent hopping terms are neglected since they are typically high-order terms originating from the on-site SOC. Next, we analyze the physical meaning of each term in the above equation.  $\tilde{m}_{0,1}$  indicate the on-site energies, with  $\tilde{m}_0 + \tilde{m}_1$  ( $\tilde{m}_0 - \tilde{m}_1$ ) the on-site energy of  $p_x$  ( $p_y$ ) orbital of Sb1.  $\lambda_0$  is the on-site SOC.  $t_0$  is the NN hopping between the same orbitals of different Sb atoms, *i.e.* from Sb1  $p_x$  to Sb2  $p_x$  or from Sb1  $p_y$  to Sb2  $p_y$ .  $t_1 + t_2$  ( $t_1 - t_2$ ) is the NN hopping from Sb1  $p_y$  ( $p_x$ ) to Sb2  $p_x$  ( $p_y$ ) for  $\Delta\mathbf{R} = 0$ .  $t_3 + t_4$  ( $t_3 - t_4$ ) is the next-NN hopping along  $x$  between  $p_x$  ( $p_y$ ) orbitals of Sb1, while  $t_5$  and  $t_6$  have the same meaning for Sb2. We emphasize that the Ba atom in supplementary Fig. 14 is essential for the non-zero values of the parameters  $\tilde{m}_1$ ,  $t_2$ ,  $t_3 - t_5$  and  $t_4 - t_6$ . Without the effect of Ba atoms, we have  $\tilde{m}_1 = t_2 = t_3 - t_5 = t_4 - t_6 = 0$ .

Now we discuss how the TB model qualitatively capture the main features of the first-principles calculation in the absence of SOC. We choose the following values of parameters:

$$\begin{aligned} \tilde{m}_0 &= 0, \quad \tilde{m}_1 = 0.3\text{eV}, \quad \lambda_0 = 0, \quad t_0 = 1\text{eV}, \quad t_1 = 2\text{eV}, \quad t_2 = 0, \quad t_3 = 0.1\text{eV}, \\ t_4 &= -0.06\text{eV}, \quad t_5 = 0.15\text{eV} \text{ and } t_6 = -0.06\text{eV}. \end{aligned} \quad (14)$$

Here  $\tilde{m}_0 = 0$  means we set the average on-site energy to be the zero of energy, and  $\lambda_0 = 0$  as we consider the case without SOC. The values of  $\tilde{m}_1$ ,  $t_2$ ,  $t_3 - t_5$  and  $t_4 - t_6$  are close to zero since they are given by the high-order effects from Ba atoms, and we choose the NN hopping  $t_{0,1}$  to have larger order of magnitudes than those of the next-NN hopping  $t_{3,4,5,6}$ . With Eq. (14), we plot the band structure and orbital projections of the TB model in supplementary

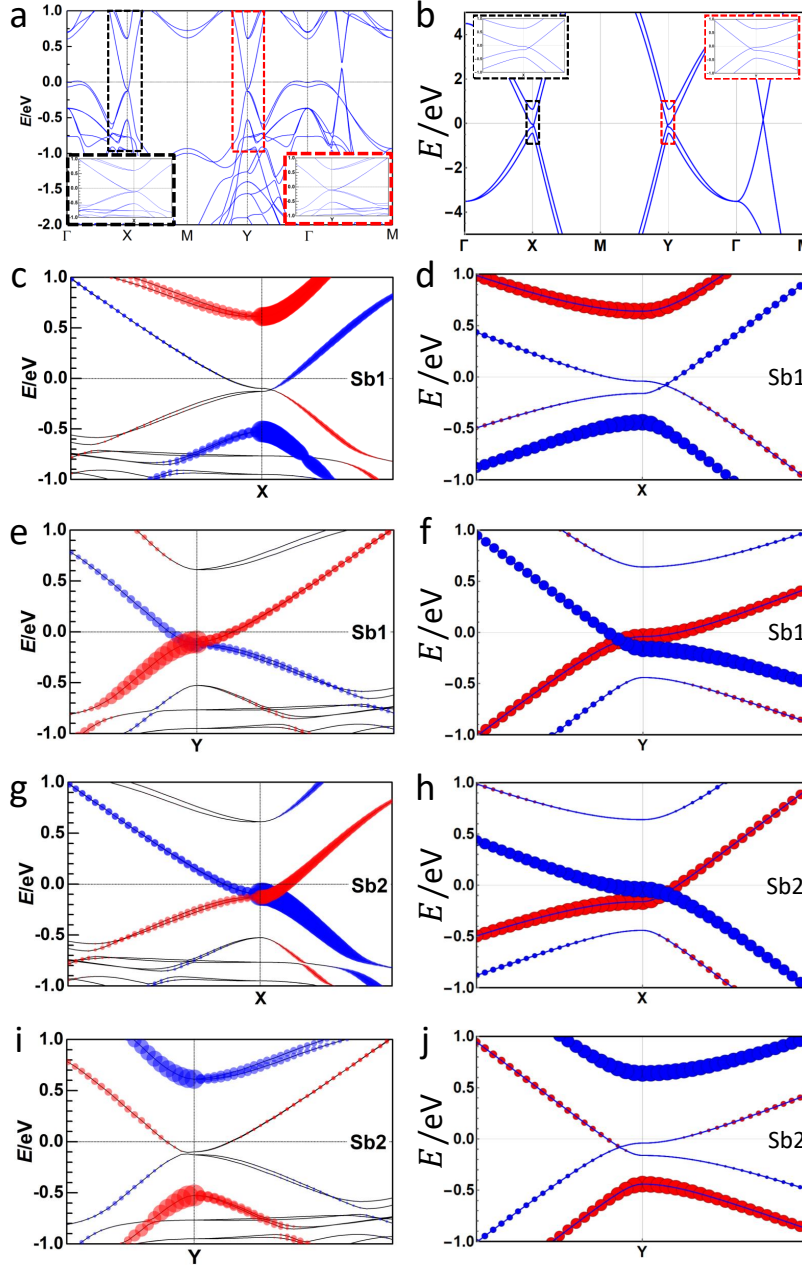

Supplementary Figure 15. (a), (c), (e), (g) and (i) are from the first-principles calculation for  $I4/mmm$  without SOC, while the TB model (13) gives (b), (d), (f), (h) and (j) with parameter choice Eq. (14). (a) and (b) show the band structure with insets the zoom-in versions of the corresponding boxed parts in the main graphs. (c) and (d) show the orbital projection to Sb1  $p_x$  and  $p_y$  orbitals at X. (e) and (f) show the orbital projection to Sb1  $p_x$  and  $p_y$  orbitals at Y. (g) and (h) show the orbital projection to Sb2  $p_x$  and  $p_y$  orbitals at X. (i) and (j) show the orbital projection to Sb2  $p_x$  and  $p_y$  orbitals at Y. In all orbital projection plots, red (blue) bubbles stand for the  $p_x$  ( $p_y$ ) orbital, and the diameters of bubbles are proportional to the projection values, *i.e.* larger diameter means larger contribution. For all plots around X (Y), the momentum axis is along  $\Gamma - X - M$  ( $M - Y - \Gamma$ ).

Fig. 15(b), (d), (f), (h) and (j). As shown in supplementary Fig. 15(a), (c), (e), (g) and (i), the key qualitative features of the the first principles calculation for  $I4/mmm$  without SOC include (i) the gapless points along  $X - M - Y$  formed by the crossing between  $p_x$  and  $p_y$  orbitals with opposite  $m_x$  and  $m_y$  parities, (ii) the large gap along  $\Gamma - X$  and  $Y - \Gamma$ , (iii) Sb2 and Sb1 contribute to the bands closer to the Fermi energy at X and Y, respectively, and (iv) Sb2  $p_y$  orbital has higher energy than Sb2  $p_x$  at X. Here  $m_i$  means the mirror symmetry with mirror plane perpendicular to direction  $i$ . supplementary Fig. 15(b), (d), (f), (h) and (j) show that all the above qualitative features are captured by the TB model calculation for the  $I4/mmm$  case.



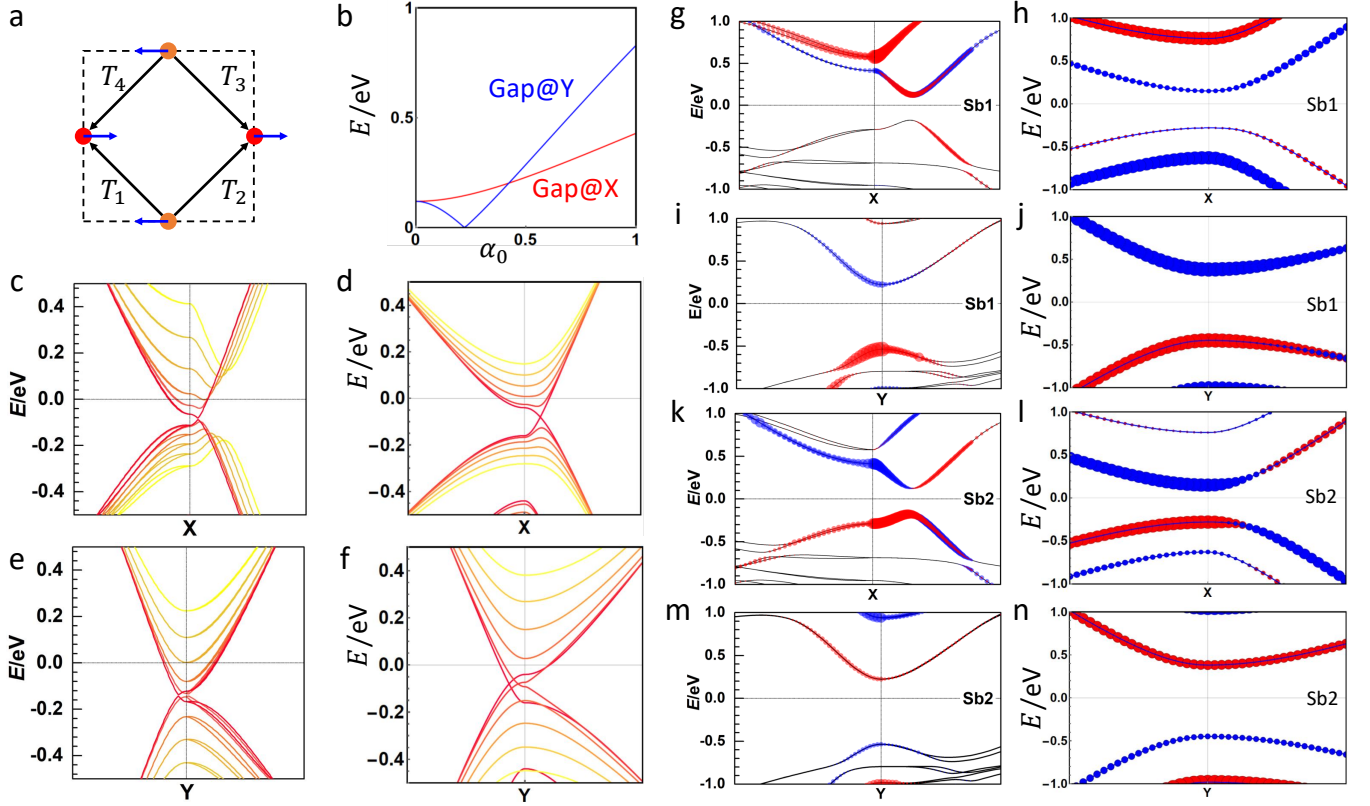

Supplementary Figure 16. Blue arrows in (a) show the relative shifts of atoms caused by the distortion in one unit cell (black dashed box). The black arrows are the NN hopping, and the red (orange) dot is Sb2 (Sb1) atom. (b) shows the change of the gap at X and Y as the distortion parameter  $\alpha_0$  increases, given by the distorted TB model (16) without SOC. (c) and (d) ((e) and (f)) show the evolution of band structure near X (Y) as distortion increases, where the distortion becomes larger from red to yellow. (g)-(n) show the orbital projection of Sb1 or Sb2 to bands near X or Y with  $p_x$  colored red and  $p_y$  colored blue. Here (c), (e), (g), (i), (k) and (m) are given by the first-principles calculation without SOC, while all others are given by the distorted TB model (16) without SOC. For all plots around X (Y), the momentum axis is along  $\Gamma - X - M$  ( $M - Y - \Gamma$ ).

In the next part, we add the zig-zag distortion to Eq. (13) to derive a TB model, and compare the model with the first-principles calculation with distortion.

The zig-zag distortion can be viewed as the shift of Sb1 atoms to the left and the shift of Sb2 atoms to the right, resulting in  $a \neq b$ ,  $x_1 = 0.4512$  and  $x_2 = 0.01729$  as determined by the first-principles calculation. (See supplementary Fig. 16(a).) This distortion reduces the space group from  $I4/mmm$  to  $I2mm$  and preserves TR symmetry. The generators of  $I2mm$  besides  $T_{1/2}$  are the 2-fold rotation  $C_{2x}$  along  $x$  and the mirror operation  $m_y$  with mirror plane perpendicular to  $y$ . The symmetry transformations of  $c_{\mathbf{R}+\boldsymbol{\tau}_i}^\dagger$  and  $c_{\mathbf{k}}^\dagger$  under the two operations read

$$\begin{aligned}
 C_{2x} c_{\mathbf{R}+\boldsymbol{\tau}_i}^\dagger C_{2x}^{-1} &= c_{C_{2x}(\mathbf{R}+\boldsymbol{\tau}_i)}^\dagger C_{2x}^{OS} \\
 m_y c_{\mathbf{R}+\boldsymbol{\tau}_i}^\dagger m_y^{-1} &= c_{m_y(\mathbf{R}+\boldsymbol{\tau}_i)}^\dagger m_y^{OS} \\
 C_{2x} c_{\mathbf{k}}^\dagger C_{2x}^{-1} &= c_{C_{2x}\mathbf{k}}^\dagger (-i\rho_0 \tau_z \sigma_x) \\
 m_y c_{\mathbf{k}}^\dagger m_y^{-1} &= c_{m_y\mathbf{k}}^\dagger (-i\rho_0 \tau_z \sigma_y),
 \end{aligned} \tag{15}$$

where  $C_{2x}^{OS} = -i\tau_z \sigma_x$ ,  $m_y^{OS} = -i\tau_z \sigma_y$  and TR transformation is shown in Eq. (11) and Eq. (12). In principle, one can use the above relations to derive all the symmetry allowed terms given by the distortion in  $H_{TB}$ , but this method is too complicated to capture the main physics. Instead, we define a distortion parameter  $\alpha_0$  with  $\alpha_0 = 0$  and  $\alpha_0 = 1$  corresponding to non-distorted and the fully-distorted cases, respectively, where the non-distorted case corresponds to the  $I4/mmm$  case where  $(x_1, x_2) = (\frac{1}{2}, 0)$  and the fully-distorted case corresponds to the realistic material with  $(x_1, x_2) = (0.4512, 0.01729)$ . Thus, we may include the distortion effect on the relative atom positions by choosing  $x_1 = \frac{1}{2} + (0.4512 - \frac{1}{2})\alpha_0$  and  $x_2 = 0.01729\alpha_0$ . On the other hand, the distortion can change the hopping parameters, e.g. it can make  $T_{1,4}$  larger than  $T_{2,3}$  as shown in supplementary Fig. 16(a). For simplicity, we include such effect by

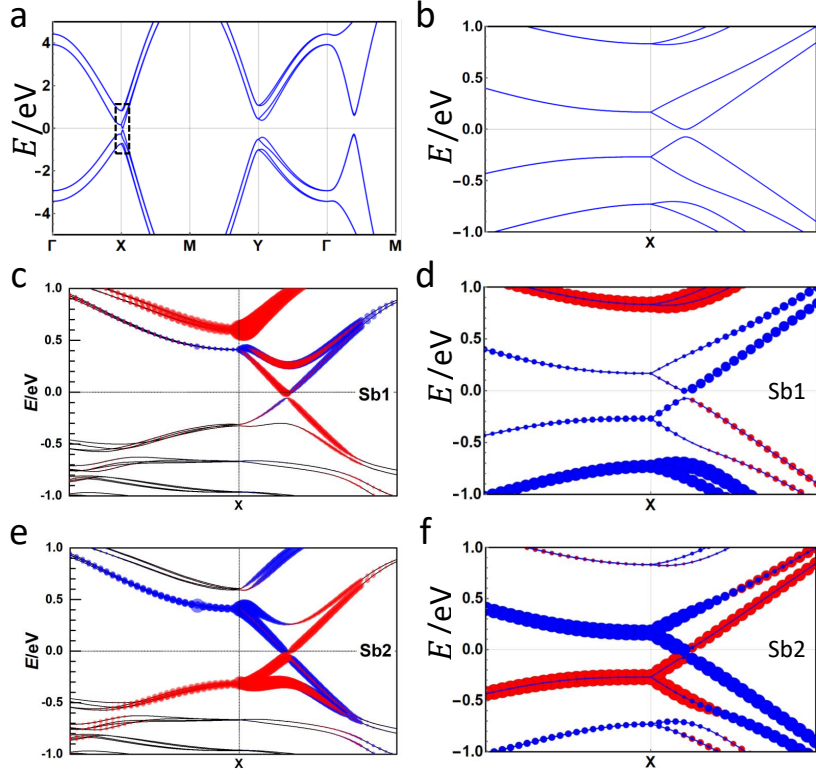

Supplementary Figure 17. (a) is the band structure given by the distorted TB model (16) with SOC, and (b) is the zoom-in version of the boxed part in (a). (c)-(f) show the orbital projection of Sb1 or Sb2 to bands near X with  $p_x$  colored red and  $p_y$  colored blue. Here (c) and (e) are given by the first-principles calculation with distortion and SOC, while (d) and (f) are given by the distorted TB model (16) with SOC. For all plots around X (Y), the momentum axis is along  $\Gamma - X - M$  ( $M - Y - \Gamma$ ).

revising Eq. (13) with

$$T_2 = \frac{\tau_z \sigma_y T_1 \tau_z \sigma_y}{f(\alpha_0)}, \quad T_4 = \tau_z \sigma_y T_1 \tau_z \sigma_y, \quad T_3 = \frac{T_1}{f(\alpha_0)}, \quad (16)$$

while keeping all other relations in Eq. (13) unchanged. It means that we simply make  $T_{2,3}$  smaller than  $T_{1,4}$  by a factor  $1/f(\alpha_0) < 1$ , while neglecting other changes of the on-site and hopping energy parameters in  $H_{TB}$  caused by the distortion. By fitting to the first-principles calculation, we get a simple linear form  $f(\alpha_0) = 0.2\alpha_0 + 1$ , and that Eq. (16) preserves  $I2mm$  symmetry can be checked with Eq. (15).

Next, we compare the distorted TB model (16) with the first-principles calculation. We first focus on the case without SOC, and use the parameter values Eq. (14) to visualize the distortion effect from  $\alpha_0 = 0$  to  $\alpha_0 = 1$  with the distorted TB model (16). As shown in supplementary Fig. 16(b), the gap at X increases as the distortion increases, while the gap at Y first closes and then reopens. In order to understand such feature, we show the evolution of the band structure near X and Y with the distortion in supplementary Fig. 16(d) and (f), in which the gapless points near X are directly gapped out as the  $m_x$  is broken by the distortion, while those near Y remain for small distortion since  $m_y$  is preserved. As the distortion increases, two gapless points near Y first move towards Y and then annihilate each other at Y, and finally a large gap at Y is opened in the fully-distorted case. Such evolution qualitatively matches the first-principles calculation for  $I2mm$  without SOC as shown in supplementary Fig. 16(c) and (e). We further plot the orbital projection with the distorted TB model for  $\alpha_0 = 1$  in supplementary Fig. 16(h), (j), (l) and (n) to compare with the first-principles calculation for the most energetically favorable distortion strength in supplementary Fig. 16(g), (i), (k) and (m), from which a qualitative match can be seen. In addition, according to supplementary Fig. 16, the anti-crossing between  $p_x$  and  $p_y$  is found along  $X - M$ . This anti-crossing originates from the gapless points along  $X - M$  in  $I4/mmm$  case, and the gap opening is induced by distortion in the  $I2mm$  case.

At last, in the fully-distorted case  $\alpha_0 = 1$ , we add the on-site SOC with  $\lambda_0 = 0.25\text{eV}$  to the distorted TB model (16), which removes the spin degeneracy and results in the formation of spin-split gapped Dirac cone as shown in supplementary Fig. 17(a) and (b), coinciding with Fig. 2(a) of the main text. The orbital projections are shown in supplementary Fig. 17(c) and (e) for the first-principles calculation and in supplementary Fig. 17(d) and (f) for the

distorted TB model, which coincide qualitatively.

### Effective Models

Next we construct the effective models around X and Y for  $I4/mmm$ , around X for  $I2mm$ , and the effective model around the two valleys  $\mathbf{K}_\pm$ . Before going into the details, let us first discuss the chosen bases. As shown in supplementary Figs. 15, 16 and 17, the main contribution to the four bands, including the spin index and per conducting Sb layer, close to the X (Y) is from the  $p_x$  and  $p_y$  orbitals of Sb2 (Sb1). Therefore, the bases should be chosen as  $c_{\mathbf{k}_X+\tilde{\mathbf{k}},2,\alpha,s}^\dagger$  for X and  $c_{\mathbf{k}_Y+\tilde{\mathbf{k}},1,\alpha,s}^\dagger$  for Y, where  $\mathbf{k}_X = (\pi/a, 0, 0)$ ,  $\mathbf{k}_Y = (0, \pi/b, 0)$ ,  $\tilde{\mathbf{k}} = \mathbf{k} - \mathbf{k}_X$  for X, and  $\tilde{\mathbf{k}} = \mathbf{k} - \mathbf{k}_Y$  for Y. In the following, we adopt the labels  $c_{\mathbf{k}_X+\tilde{\mathbf{k}},2}^\dagger = (c_{\mathbf{k}_X+\tilde{\mathbf{k}},2,p_x,\uparrow}^\dagger, c_{\mathbf{k}_X+\tilde{\mathbf{k}},2,p_x,\downarrow}^\dagger, c_{\mathbf{k}_X+\tilde{\mathbf{k}},2,p_y,\uparrow}^\dagger, c_{\mathbf{k}_X+\tilde{\mathbf{k}},2,p_y,\downarrow}^\dagger)$  and  $c_{\mathbf{k}_Y+\tilde{\mathbf{k}},1}^\dagger = (c_{\mathbf{k}_Y+\tilde{\mathbf{k}},1,p_x,\uparrow}^\dagger, c_{\mathbf{k}_Y+\tilde{\mathbf{k}},1,p_x,\downarrow}^\dagger, c_{\mathbf{k}_Y+\tilde{\mathbf{k}},1,p_y,\uparrow}^\dagger, c_{\mathbf{k}_Y+\tilde{\mathbf{k}},1,p_y,\downarrow}^\dagger)$  for convenience.

As discussed above, we need to consider 4 symmetry operations:  $C_{4z}$ ,  $C_{2y}$ ,  $P$  and  $\mathcal{T}$ , where the first three span the point group  $D_{4h}$ . [17] Since  $C_{4z}$  relates X with Y, we need to construct the effective models around X and Y simultaneously with both  $c_{\mathbf{k}_X+\tilde{\mathbf{k}},2}^\dagger$  and  $c_{\mathbf{k}_Y+\tilde{\mathbf{k}},1}^\dagger$ . According to Eq. (12), the transformations of  $c_{\mathbf{k}_X+\tilde{\mathbf{k}},2}^\dagger$  and  $c_{\mathbf{k}_Y+\tilde{\mathbf{k}},1}^\dagger$  under those symmetry operations read

$$\begin{aligned} C_{4z} c_{\mathbf{k}_X+\tilde{\mathbf{k}},2}^\dagger C_{4z}^{-1} &= c_{\mathbf{k}_Y+C_{4z}\tilde{\mathbf{k}},1}^\dagger C_{4z}^{OS}, \quad C_{4z} c_{\mathbf{k}_Y+\tilde{\mathbf{k}},1}^\dagger C_{4z}^{-1} = c_{\mathbf{k}_X+C_{4z}\tilde{\mathbf{k}},2}^\dagger C_{4z}^{OS}, \\ C_{2y} c_{\mathbf{k}_X+\tilde{\mathbf{k}},2}^\dagger C_{2y}^{-1} &= c_{\mathbf{k}_X+C_{2y}\tilde{\mathbf{k}},2}^\dagger C_{2y}^{OS}, \quad C_{2y} c_{\mathbf{k}_Y+\tilde{\mathbf{k}},1}^\dagger C_{2y}^{-1} = c_{\mathbf{k}_Y+C_{2y}\tilde{\mathbf{k}},1}^\dagger C_{2y}^{OS}, \\ P c_{\mathbf{k}_X+\tilde{\mathbf{k}},2}^\dagger P^{-1} &= c_{\mathbf{k}_X-\tilde{\mathbf{k}},2}^\dagger P^{OS}, \quad P c_{\mathbf{k}_Y+\tilde{\mathbf{k}},1}^\dagger P^{-1} = c_{\mathbf{k}_Y-\tilde{\mathbf{k}},1}^\dagger P^{OS}, \\ \mathcal{T} c_{\mathbf{k}_X+\tilde{\mathbf{k}},2}^\dagger \mathcal{T}^{-1} &= c_{\mathbf{k}_X-\tilde{\mathbf{k}},2}^\dagger \mathcal{T}^{OS}, \quad \mathcal{T} c_{\mathbf{k}_Y+\tilde{\mathbf{k}},1}^\dagger \mathcal{T}^{-1} = c_{\mathbf{k}_Y-\tilde{\mathbf{k}},1}^\dagger \mathcal{T}^{OS}, \end{aligned} \quad (17)$$

where the expressions of  $C_{4z}^{OS}$ ,  $C_{2y}^{OS}$ ,  $P^{OS}$  and  $\mathcal{T}^{OS}$  can be found below Eq. (11). Next, we derive the form of the effective models around X and Y, *i.e.*  $H_X = \sum_{\tilde{\mathbf{k}}} c_{\mathbf{k}_X+\tilde{\mathbf{k}},2}^\dagger h_X(\tilde{\mathbf{k}}) c_{\mathbf{k}_X+\tilde{\mathbf{k}},2}$  and  $H_Y = \sum_{\tilde{\mathbf{k}}} c_{\mathbf{k}_Y+\tilde{\mathbf{k}},1}^\dagger h_Y(\tilde{\mathbf{k}}) c_{\mathbf{k}_Y+\tilde{\mathbf{k}},1}$ , to the second order of  $\tilde{\mathbf{k}}$  based on the symmetry properties listed in Eq. (17).

Since the effective models,  $h_X(\tilde{\mathbf{k}})$  and  $h_Y(\tilde{\mathbf{k}})$ , consist of  $\tau$  matrices,  $\sigma$  matrices and the momentum  $\tilde{\mathbf{k}}$  to the second order, it is convenient to list their symmetry transformations according to Eq. (17), which are summarized in supplementary Tab. 3.

|               | $\tau_0$ | $\tau_x$ | $\tau_y$ | $\tau_z$ | $\sigma_0$ | $(\sigma_x, \sigma_y)$                   | $\sigma_z$ | $1, \tilde{k}_x^2 + \tilde{k}_y^2$ | $(\tilde{k}_x, \tilde{k}_y)$             | $\tilde{k}_x \tilde{k}_y$ | $\tilde{k}_x^2 - \tilde{k}_y^2$ |
|---------------|----------|----------|----------|----------|------------|------------------------------------------|------------|------------------------------------|------------------------------------------|---------------------------|---------------------------------|
| $C_{4z}$      | +        | -        | +        | -        | +          | $\begin{pmatrix} -1 \\ 1 \end{pmatrix}$  | +          | +                                  | $\begin{pmatrix} -1 \\ 1 \end{pmatrix}$  | -                         | -                               |
| $C_{2y}$      | +        | -        | -        | +        | +          | $\begin{pmatrix} -1 \\ 1 \end{pmatrix}$  | -          | +                                  | $\begin{pmatrix} -1 \\ 1 \end{pmatrix}$  | -                         | +                               |
| $P$           | +        | +        | +        | +        | +          | $\begin{pmatrix} 1 \\ 1 \end{pmatrix}$   | +          | +                                  | $\begin{pmatrix} -1 \\ -1 \end{pmatrix}$ | +                         | +                               |
| $\mathcal{T}$ | +        | +        | -        | +        | +          | $\begin{pmatrix} -1 \\ -1 \end{pmatrix}$ | -          | +                                  | $\begin{pmatrix} -1 \\ -1 \end{pmatrix}$ | +                         | +                               |
| IR            | $A_{1g}$ | $B_{2g}$ | $A_{2g}$ | $B_{1g}$ | $A_{1g}$   | $E_g$                                    | $A_{2g}$   | $A_{1g}$                           | $E_u$                                    | $B_{2g}$                  | $B_{1g}$                        |

Supplementary Table 3. The symmetry transformations of  $\tau$  matrices,  $\sigma$  matrices and the momentum  $\tilde{\mathbf{k}}$  to the second order under  $C_{4z}$ ,  $C_{2y}$ ,  $P$  and  $\mathcal{T}$  operations. Here  $\pm$  indicate their parities under the corresponding operation, and the transformation matrix, say  $R$ , follows the transformation rule  $\mathbf{v} \rightarrow \mathbf{v}R$  for a row vector  $\mathbf{v}$ . The last row shows the irreducible representations (IRs) of  $D_{4h}$  according to the notation in Ref. [17].

From tensor products of elements in supplementary Tab. 3, we can construct the most general symmetry-allowed forms of  $h_X(\tilde{\mathbf{k}})$  and  $h_Y(\tilde{\mathbf{k}})$ , which read

$$\begin{aligned} h_X(\tilde{\mathbf{k}}) &= (m_0 + B_{0x}\tilde{k}_x^2 + B_{0y}\tilde{k}_y^2)\tau_0\sigma_0 + (m + B_x\tilde{k}_x^2 + B_y\tilde{k}_y^2)\tau_z\sigma_0 + B_2\tilde{k}_x\tilde{k}_y\tau_x\sigma_0 + \lambda_0\tau_y\sigma_z \\ h_Y(\tilde{\mathbf{k}}) &= (m_0 + B_{0y}\tilde{k}_x^2 + B_{0x}\tilde{k}_y^2)\tau_0\sigma_0 + (-m - B_y\tilde{k}_x^2 - B_x\tilde{k}_y^2)\tau_z\sigma_0 + B_2\tilde{k}_x\tilde{k}_y\tau_x\sigma_0 + \lambda_0\tau_y\sigma_z. \end{aligned} \quad (18)$$

Here we only include the on-site (thus  $\tilde{\mathbf{k}}$ -independent) SOC, *i.e.* the  $\lambda_0$  term, and neglect third and higher orders of  $\tilde{\mathbf{k}}$ . To verify Eq. (18), we expand the TB model (13) around X and Y to the second order of the momentum, and project all terms other than SOC to the corresponding bases with second order perturbation, leading to the same form as Eq. (18) with the parameters given by

$$\begin{aligned}
m_0 &= \tilde{m}_0 + 2t_3 - 2t_5, \quad m = -\tilde{m}_1 - 2(t_4 + t_6), \\
B_{0x} &= b^2 \left( 2t_0^2 \left( \frac{1}{2(2t_3 + t_4 - 2t_5 + t_6) - \tilde{m}_1} + \frac{1}{\tilde{m}_1 + 4t_3 - 2(t_4 + 2t_5 + t_6)} \right) + t_5 \right), \\
B_{0y} &= b^2 \left( -\frac{2(t_1 - t_2)^2}{\tilde{m}_1 - 2(2t_3 + t_4 - 2t_5 + t_6)} + \frac{2(t_1 + t_2)^2}{\tilde{m}_1 + 4t_3 - 2(t_4 + 2t_5 + t_6)} - t_3 \right), \\
B_x &= b^2 \left( 2t_0^2 \left( \frac{1}{2(2t_3 + t_4 - 2t_5 + t_6) - \tilde{m}_1} - \frac{1}{\tilde{m}_1 + 4t_3 - 2(t_4 + 2t_5 + t_6)} \right) + t_6 \right), \\
B_y &= b^2 \left( \frac{2(t_1 - t_2)^2}{\tilde{m}_1 - 2(2t_3 + t_4 - 2t_5 + t_6)} + \frac{2(t_1 + t_2)^2}{\tilde{m}_1 + 4t_3 - 2(t_4 + 2t_5 + t_6)} + t_4 \right), \\
B_2 &= -\frac{8b^2 t_0 (\tilde{m}_1 t_2 + 4t_1(t_5 - t_3) - 2t_2(t_4 + t_6))}{(\tilde{m}_1 - 2(2t_3 + t_4 - 2t_5 + t_6))(\tilde{m}_1 + 4t_3 - 2(t_4 + 2t_5 + t_6))}, \tag{19}
\end{aligned}$$

implying that all terms in Eq. (18) can naturally exist. As  $a = b$  in this  $I4/mmm$  case, all  $b$ 's in the above relations can be replaced by  $a$ .

Before moving on to the case with distortion, let us discuss the signs of  $m, B_x, B_y$  in Eq. (18) according to the orbital projection shown in supplementary Fig. 15. Since supplementary Fig. 15 is done without SOC, we consider Eq. (18) without SOC, *i.e.*  $\lambda_0 = 0$ . At X, the energies of Sb2  $p_x$  and  $p_y$  are  $m_0 + m$  and  $m_0 - m$ , respectively, according to Eq. (18). Since the energy of Sb2  $p_y$  is larger than that of Sb2  $p_x$  at X as shown in supplementary Fig. 15, we have  $m < 0$ . Along  $\Gamma - X$ , the gap between Sb2  $p_x$  and  $p_y$  bands reads  $E_{p_x} - E_{p_y} = 2(m + B_x \tilde{k}_x^2)$  according to Eq. (18), and thus the large gap along  $\Gamma - X$  in supplementary Fig. 15 gives  $B_x < 0$ . Along X-M, the gap between Sb2  $p_x$  and  $p_y$  bands reads  $E_{p_x} - E_{p_y} = 2(m + B_y \tilde{k}_y^2)$  according to Eq. (18), and thus the gapless point along X-M in supplementary Fig. 15 means  $B_y > 0$ . As a result, the positions of the two gapless points along X-M are

$$\mathbf{K}_{\pm} = (\pi/a, \pm\sqrt{-m/B_y}) \tag{20}$$

according to Eq. (18), corresponding to the two valleys defined in the main text.

As discussed above, the space group becomes  $I2mm$  in the presence of the zig-zag distortion, and we only need to consider  $C_{2x}, m_y$  and  $\mathcal{T}$  operations, where the first two span the point group  $C_{2v}$ . [17] As suggested by the first-principles and TB calculations (supplementary Figs. 16 and 17), we only need to consider the effective model around  $X$  with the bases  $c_{\mathbf{k}_X + \tilde{\mathbf{k}}, 2}^{\dagger}$ , which have the following transformations according to Eq. (15).

$$\begin{aligned}
C_{2x} c_{\mathbf{k}_X + \tilde{\mathbf{k}}, 2}^{\dagger} C_{2x}^{-1} &= c_{\mathbf{k}_X + C_{2x} \tilde{\mathbf{k}}, 2}^{\dagger} C_{2x}^{OS}, \\
m_y c_{\mathbf{k}_X + \tilde{\mathbf{k}}, 2}^{\dagger} m_y^{-1} &= c_{\mathbf{k}_X + m_y \tilde{\mathbf{k}}, 2}^{\dagger} m_y^{OS}, \\
\mathcal{T} c_{\mathbf{k}_X + \tilde{\mathbf{k}}, 2}^{\dagger} \mathcal{T}^{-1} &= c_{\mathbf{k}_X - \tilde{\mathbf{k}}, 2}^{\dagger} \mathcal{T}^{OS}, \tag{21}
\end{aligned}$$

where  $C_{2x}^{OS}, m_y^{OS}$  and  $\mathcal{T}^{OS}$  are listed below Eq. (15) and Eq. (11). Similar as supplementary Tab. 3, the matrices and momentum in  $h_X(\tilde{\mathbf{k}})$  in this case can be classified based on their symmetry properties, as summarized in supplementary Tab. 4.

|               | $\tau_0$ | $\tau_x$ | $\tau_y$ | $\tau_z$ | $\sigma_0$ | $\sigma_x$ | $\sigma_y$ | $\sigma_z$ | 1, $\tilde{k}_x^2, \tilde{k}_y^2$ | $\tilde{k}_x$ | $\tilde{k}_y$ | $\tilde{k}_x \tilde{k}_y$ |
|---------------|----------|----------|----------|----------|------------|------------|------------|------------|-----------------------------------|---------------|---------------|---------------------------|
| $C_{2x}$      | +        | -        | -        | +        | +          | +          | -          | -          | +                                 | +             | -             | -                         |
| $m_y$         | +        | -        | -        | +        | +          | -          | +          | -          | +                                 | +             | -             | -                         |
| $\mathcal{T}$ | +        | +        | -        | +        | +          | -          | -          | -          | +                                 | -             | -             | +                         |
| IR            | $A_1$    | $B_1$    | $B_1$    | $A_1$    | $A_1$      | $A_2$      | $B_2$      | $B_1$      | $A_1$                             | $A_1$         | $B_1$         | $B_1$                     |

Supplementary Table 4. The transformations of  $\tau$  matrices,  $\sigma$  matrices and the momentum  $\tilde{\mathbf{k}}$  to the second order under  $C_{2x}, m_y$  and  $\mathcal{T}$  operations. Here  $\pm$  indicate the parity under the corresponding operation. The last row shows the IRs of point group  $C_{2v}$  according to the notation in Ref. [17].

With on-site SOC and the spin-independent terms up to second order of momenta, the most general symmetry-allowed form of  $h_X(\tilde{\mathbf{k}})$  for  $I2mm$  can be derived from supplementary Tab. 4, and reads

$$h_X(\tilde{\mathbf{k}}) = (m_0 + B_{0x}\tilde{k}_x^2 + B_{0y}\tilde{k}_y^2)\tau_0\sigma_0 + (m + B_x\tilde{k}_x^2 + B_y\tilde{k}_y^2)\tau_z\sigma_0 + B_2\tilde{k}_x\tilde{k}_y\tau_x\sigma_0 + A_0\tilde{k}_y\tau_y\sigma_0 + \lambda_0\tau_y\sigma_z, \quad (22)$$

where  $A_0$  is the extra term brought by the distortion as compared with Eq. (18). To check the above equation, we can re-derive the effective model (22) from Eq. (16) in the same way as above. As a result, the values of parameters in Eq. (22) can be determined by Eq. (14) and  $\alpha_0 = 1$ , which read

$$\begin{aligned} m_0 &= -0.0116764\text{eV}, m = -0.298474\text{eV}, B_{0x} = 2.88066a^2\text{eV}, B_{0y} = 10.5005b^2\text{eV}, B_x = -7.28705a^2\text{eV}, \\ B_y &= 28.8769b^2\text{eV}, B_2 = -10.5988abe\text{V}, A_0 = 5.24642be\text{V}. \end{aligned} \quad (23)$$

At the end of this part, we discuss the effect of distortion based on Eq. (22) and supplementary Fig. 16. As supplementary Fig. 16 is done without SOC, we discuss Eq. (22) without SOC, *i.e.*  $\lambda_0 = 0$ . The larger Sb2  $p_y$  energy indicates  $m < 0$ , and the large gap along  $\Gamma - X$  shows  $B_x < 0$ . The band dispersion along  $X - M$  is given by  $m_0 + B_{0y}\tilde{k}_y^2 \pm \sqrt{(m + B_y\tilde{k}_y^2)^2 + (A_0\tilde{k}_y)^2}$  according to Eq. (22), and a clear band inversion signature along  $X - M$  between Sb2  $p_x$  and  $p_y$  is shown in supplementary Fig. 16(k) and (l). It indicates that  $B_y > 0$ , that gives rise to the gapless points at positions (20) for  $A_0 = 0$ .  $A_0 \neq 0$  opens the gap and leads to the inverted band structure. Therefore, the distortion does not change the sign of  $m, B_x, B_y$ , and its main effect is introducing a non-zero  $A_0$  to open the gap along  $X - M$ .

In this part, we try to capture the gapped Dirac cone feature in supplementary Fig. 17, which is plotted with distortion and SOC, by constructing the effective models around the two valleys. Now the bases should be chosen as  $c_{\mathbf{K}_{\pm}+\mathbf{q},2}^{\dagger} = (c_{\mathbf{K}_{\pm}+\mathbf{q},2,p_x,\uparrow}^{\dagger}, c_{\mathbf{K}_{\pm}+\mathbf{q},2,p_x,\downarrow}^{\dagger}, c_{\mathbf{K}_{\pm}+\mathbf{q},2,p_y,\uparrow}^{\dagger}, c_{\mathbf{K}_{\pm}+\mathbf{q},2,p_y,\downarrow}^{\dagger})$ , where  $\mathbf{q} = \mathbf{k} - \mathbf{K}_{\pm}$ ,  $\mathbf{K}_{\pm} = (\pi/a, \pm k_{y0})$  and  $k_{y0} > 0$ , and the effective Hamiltonian reads  $H_{DC} = \sum_{\mathbf{q}} \sum_{\beta=\pm} c_{\mathbf{K}_{\beta}+\mathbf{q},2}^{\dagger} h_{\beta}(\mathbf{q}) c_{\mathbf{K}_{\beta}+\mathbf{q},2}$  with “DC” short for “Dirac cone”. Although  $k_{y0} = \sqrt{-m/B_y}$  according to Eq. (20) for the  $I4/mmm$  case, in general it can be shifted by the distortion and terms with higher-order momenta. As the last part, we still only need to consider  $C_{2x}$ ,  $m_y$  and  $\mathcal{T}$  operations and the corresponding transformations according to Eq. (15) read

$$\begin{aligned} C_{2x}c_{\mathbf{K}_{\beta}+\mathbf{q},2}^{\dagger}C_{2x}^{-1} &= c_{\mathbf{K}_{-\beta}+C_{2x}\mathbf{q},2}^{\dagger}C_{2x}^{OS}, \\ m_y c_{\mathbf{K}_{\beta}+\mathbf{q},2}^{\dagger} m_y^{-1} &= c_{\mathbf{K}_{-\beta}+m_y\mathbf{q},2}^{\dagger} m_y^{OS}, \\ \mathcal{T}c_{\mathbf{K}_{\beta}+\mathbf{q},2}^{\dagger}\mathcal{T}^{-1} &= c_{\mathbf{K}_{-\beta}-\mathbf{q},2}^{\dagger}\mathcal{T}^{OS}, \end{aligned} \quad (24)$$

where  $C_{2x}^{OS}$ ,  $m_y^{OS}$  and  $\mathcal{T}^{OS}$  are listed below Eq. (15) and Eq. (11). As the above transformations are similar as Eq. (21), the table of the symmetry properties of matrices and  $\mathbf{q}$  in  $h_{\beta}(\mathbf{q})$  is the same as supplementary Tab. 4 if replacing  $\tilde{\mathbf{k}}$  by  $\mathbf{q}$ . As a result, the effective model around  $\mathbf{K}_{\pm}$  to the leading order of  $\mathbf{q}$  has the form

$$h_{\pm}(\mathbf{q}) = (E_0 \pm v_0q_y)\tau_0\sigma_0 \pm v_2q_y\tau_z\sigma_0 \pm v_1q_x\tau_x\sigma_0 + (v_3q_y \pm E_1)\tau_y\sigma_0 + \lambda_0\tau_y\sigma_z, \quad (25)$$

where we set the constant coefficient coupled to  $\tau_z\sigma_0$  to zero by shifting the valley position, and we only include the on-site SOC that has the form  $\tau_y\sigma_z$ . The relation between Eq. (25) and Eq. (22) can be derived by choosing  $\mathbf{K}_{\pm}$  as Eq. (20) and expanding Eq. (22) around  $\mathbf{K}_{\pm}$  to the first order of  $\mathbf{q}$ , and reads

$$E_0 = -\frac{B_{0y}m - B_y m_0}{B_y}, E_1 = A_0\sqrt{-\frac{m}{B_y}}, v_0 = 2B_{0y}\sqrt{-\frac{m}{B_y}}, v_1 = B_2\sqrt{-\frac{m}{B_y}}, v_2 = 2B_y\sqrt{-\frac{m}{B_y}}, v_3 = A_0. \quad (26)$$

Although the above relation cannot restrict the specific values of parameters in Eq. (25) since terms with higher order momenta in Eq. (22) may change the relation, it does indicate the main contribution and provides the following two points: (I)  $v_2 < 0$  given by  $B_y < 0$  discussed in the last part and (ii)  $E_1$  and  $v_3$  originate from the distortion as they are related with  $A_0$ . We next add a  $\mathbf{q}$ -quadratic term  $\pm b_0(v_1^2q_x^2 + v_2^2q_y^2)\tau_y\sigma_0$  to Eq. (25) in order to explain the LL splitting in the next section, and Eq. (25) becomes

$$h_{\pm}(\mathbf{q}) = (E_0 \pm v_0q_y)\tau_0\sigma_0 \pm v_2q_y\tau_z\sigma_0 \pm v_1q_x\tau_x\sigma_0 + [v_3q_y \pm E_1 \pm b_0(v_1^2q_x^2 + v_2^2q_y^2)]\tau_y\sigma_0 + \lambda_0\tau_y\sigma_z. \quad (27)$$

We would like to emphasize that the  $\mathbf{q}$ -quadratic term that we add is just one of the symmetry-allowed  $\mathbf{q}$ -quadratic terms, and we neglect other terms since that one is enough to account for the LL splitting as discussed in the following and it simplifies the procedure of analytically solving the LL.

With  $v_2 < 0$ , we choose  $\lambda_0 > 0$  and  $E_1 < 0$  without loss of generality, and fit the Eq. (27) to the first-principles data, resulting in

$$\begin{aligned} E_0 &= -0.0159125\text{eV}, E_1 = -0.12955\text{eV}, v_0 = -0.770856\text{\AA eV}, v_1 = 1.70245\text{\AA eV}, \\ v_2 &= 7.9056\text{\AA eV}, v_3 = -0.000840073\text{\AA eV}, \lambda_0 = 0.1531\text{eV}, b_0 = 1.5\text{eV}^{-1}. \end{aligned} \quad (28)$$

The comparison between the fitted effective model and the first-principles data is shown in Fig. 18(b). As shown by Eq. (28),  $v_3$  can be neglected, meaning that  $E_1$  is the main effect of the distortion in Eq. (25).

At last, we discuss the spin-valley locking according to Eq. (27). From  $h_\beta(0) = E_0\tau_0\sigma_0 + \beta E_1\tau_y\sigma_0 + \lambda_0\tau_y\sigma_z$ , we know the eigenvalues of  $h_\beta(0)$  are  $E_0 + \beta E_1 + \lambda_0$ ,  $E_0 + \beta E_1 - \lambda_0$ ,  $E_0 - \beta E_1 - \lambda_0$  and  $E_0 - \beta E_1 + \lambda_0$  with corresponding eigenstates  $|p_+, \uparrow\rangle$ ,  $|p_+, \downarrow\rangle$ ,  $|p_-, \uparrow\rangle$  and  $|p_-, \downarrow\rangle$ , respectively. Here  $p_\pm = (p_x \pm ip_y)/\sqrt{2}$ . The expressions of eigenvalues indicate that the appearance of SOC  $\lambda_0$  in the presence of distortion  $E_1$  always brings two bands closer with gap  $2||E_1| - |\lambda_0||$  and takes the other two further apart with gap  $2(|E_1| + |\lambda_0|)$ . The gapped Dirac cone is naturally formed by the two closer bands as long as  $|E_1| \neq |\lambda_0|$  with  $v_1$  and  $v_2$  terms in Eq. (27) giving the linear dispersion in the gapless case. Combing the eigenvalue expressions with the eigenstates, we find that the two bases that form the Dirac cone must have the same spin, and the spins at opposite valleys are opposite, resulting in the spin-valley locking. Such feature physically originates from the opposite on-site SOC for  $p_\pm$ , and thus the bands with the same spin always get pushed either closer or further apart by the SOC. As  $E_1 < 0$  and  $\lambda_0 > 0$  are chosen, the two bases that form the Dirac cone at  $\mathbf{K}_+$  ( $\mathbf{K}_-$ ) have spin up (down). It means that the spin up sector of  $h_+$  and spin down sector of  $h_-$  in Eq. (25) account for the low-energy physics, which read

$$\begin{aligned} h_{+, \uparrow}(\mathbf{q}) &= (E_0 + v_0q_y)\tau_0 + v_2q_y\tau_z + v_1q_x\tau_x + (v_3q_y + E_1 + b_0(v_1^2q_x^2 + v_2^2q_y^2))\tau_y + \lambda_0\tau_y \\ h_{-, \downarrow}(\mathbf{q}) &= (E_0 - v_0q_y)\tau_0 - v_2q_y\tau_z - v_1q_x\tau_x + (v_3q_y - E_1 - b_0(v_1^2q_x^2 + v_2^2q_y^2))\tau_y - \lambda_0\tau_y. \end{aligned} \quad (29)$$

### Landau Levels

Next, we solve for the LLs of Eq. (29) in the presence of a uniform magnetic field along  $z$ , *i.e.*  $\mathbf{B} = (0, 0, B)$ . We denote the vector potential for the magnetic field as  $\mathbf{A}$ , *i.e.*  $\mathbf{B} = \nabla \times \mathbf{A}$ .

We first discuss the modification of the models in Eq. (29) in order to solve for the LLs. The magnetic field can introduce the Zeeman term as  $\mu_B B$  in  $h_{+, \uparrow}(\mathbf{q})$  and as  $-\mu_B B$  in  $h_{-, \downarrow}(\mathbf{q})$  with  $\mu_B$  the Bohr magneton, since the two Hamiltonians are in opposite spin sectors. As discussed in the main text, the Zeeman term is estimated to have smaller order of magnitude than the  $\mathbf{q}$ -quadratic term. We estimate the order of magnitude of the  $\mathbf{q}$ -quadratic term as follows. As the coefficients of the  $\mathbf{q}$ -quadratic term are  $b_0v_1^2$  and  $b_0v_2^2$ , we may take the average of them  $\kappa = \sqrt{(b_0v_1^2)(b_0v_2^2)}$  as their order of magnitude, and then the energy scale of the contribution of  $\mathbf{q}$ -quadratic terms to LLs can be estimated by  $\kappa/l_B^2 \sim 0.3\text{meV}(B/\text{Tesla})$ , which is much larger than the order of Zeeman term as discussed in the main text. Here  $l_B = \sqrt{\hbar/(eB)}$  is the magnetic length and  $e > 0$  is the elementary charge. The magnetic field also introduces the Peierls substitution  $\mathbf{q} \rightarrow \mathbf{q} + e\mathbf{A}/\hbar$  to both  $h_{+, \uparrow}(\mathbf{q})$  and  $h_{-, \downarrow}(\mathbf{q})$  as the orbital effect. In addition, we want to transformation the bases from  $p_{x,y}$  to  $p_\pm$  with the unitary transformation

$$U = \begin{pmatrix} \frac{1}{\sqrt{2}} & \frac{1}{\sqrt{2}} \\ \frac{i}{\sqrt{2}} & -\frac{i}{\sqrt{2}} \end{pmatrix}. \quad (30)$$

With all the above three modifications,  $h_{+, \uparrow}(\mathbf{q})$  turns into

$$\begin{aligned} \tilde{h}_{+, \uparrow} &= h_0 + h_1 + h_2, \\ h_0 &= (E_0 + \mu_B B)\tau_0 + \text{sgn}(v_2)D_y\tau_x + \text{sgn}(v_1)D_x\tau_y, \\ h_1 &= [E_1 + \lambda_0 + b_0(D_x^2 + D_y^2)]\tau_z, \\ h_2 &= \frac{v_0}{|v_2|}D_y\tau_0 + \frac{v_3}{|v_2|}D_y\tau_z, \end{aligned} \quad (31)$$

where  $\tau$  matrices are for  $p_\pm$  now,  $D_x = |v_1|(q_x + eA_x/\hbar)$  and  $D_y = |v_2|(q_y + eA_y/\hbar)$ . The modified  $h_{-, \downarrow}$ , noted as  $\tilde{h}_{-, \downarrow}$ , can be derived by flipping the sign of  $v_0, v_1, E_1, v_2, \lambda_0, b_0, \mu_B$  in  $\tilde{h}_{+, \uparrow}$ , and thus we solve for the LLs of  $\tilde{h}_{+, \uparrow}$  in the following and derive the LLs of  $\tilde{h}_{-, \downarrow}$  by the sign flipping.

To solve for the LLs of  $\tilde{h}_{+, \uparrow}$ , we first address  $h_0$ , and then take  $h_1$  and  $h_2$  into account by representing them with eigenstates of  $h_0$ . As suggested by Eq. (28), we choose  $v_1 > 0$  and  $v_2 > 0$ . Since  $[D_x, D_y] = -i|v_1v_2|eB/\hbar$ , we can

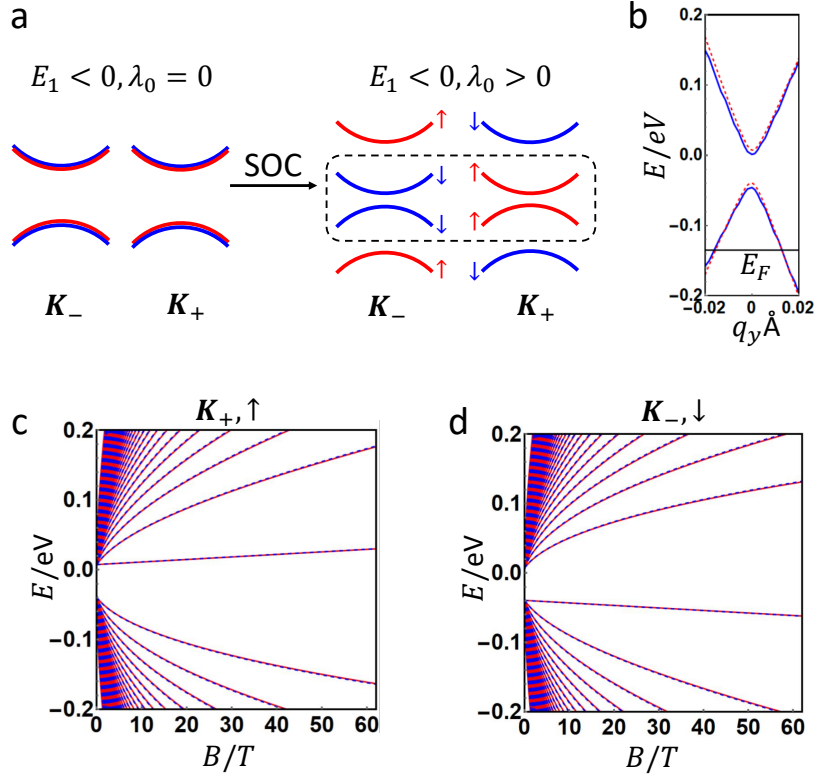

Supplementary Figure 18. (a) schematically shows the spin-valley locking of the gapped Dirac cone for  $E_1 < 0$  and  $\lambda_0 \geq 0$ . The blue (red) bands have up (down) spin. The bands that form the gapped Dirac cone are boxed by the black dashed line. (b) is the comparison of the band structures from the first-principles calculation (blue) and the effective model (red dashed) around  $K_+$ . The black line shows  $E_F$ . (c) and (d) compare the LLs (red solid lines) calculated numerically from  $\tilde{h}_{+,\uparrow}$  and  $\tilde{h}_{-,\downarrow}$ , and the LLs (blue dashed lines) given by Eq. (35) and Eq. (36). (c) and (d) correspond to  $\tilde{h}_{+,\uparrow}$  and  $\tilde{h}_{-,\downarrow}$ , respectively.

define  $\hat{a} = (D_x - iD_y) \frac{l_B}{\sqrt{2|v_1 v_2|}}$ , and have  $[\hat{a}, \hat{a}^\dagger] = 1$ . As a result,  $h_0$  can be re-written as

$$h_0 = (E_0 + \mu_B B) \tau_0 + \frac{\sqrt{2|v_1 v_2|}}{l_B} i \begin{pmatrix} 0 & -\hat{a}^\dagger \\ \hat{a} & 0 \end{pmatrix}, \quad (32)$$

and its eigenvalues and eigenstates read

$$h_0 |\psi_0\rangle = (E_0 + \mu_B B) |\psi_0\rangle, \quad h_0 |\psi_l^\pm\rangle = \left( E_0 + \mu_B B \pm \frac{\sqrt{2|v_1 v_2|} l}{l_B} \right) |\psi_l^\pm\rangle, \quad (33)$$

where  $|\psi_0\rangle = (|0\rangle, 0)^T$ ,  $l = 1, 2, 3, \dots$ ,  $|\psi_l^\pm\rangle = (|l\rangle, \pm i|l-1\rangle)^T / \sqrt{2}$ ,  $\hat{a}^\dagger \hat{a} |0\rangle = 0$  and  $\hat{a}^\dagger \hat{a} |l\rangle = l |l\rangle$ .

Now we include  $h_1$  and  $h_2$ . Although each LL of  $h_0$  has degeneracy  $1/(2\pi l_B^2)$ ,  $h_1$  and  $h_2$  do not break such degeneracy since they only depend on  $\hat{a}, \hat{a}^\dagger$ , and thus we can only focus on one degenerate subspace or equivalently omit the degenerate index. Within  $\{|\phi_0\rangle, |\phi_l^\pm\rangle\}$  bases, the matrix element of  $h_1$  has the form

$$[h_1]_{00} = E_1 + \lambda_0 + \frac{b_0 |v_1 v_2|}{l_B^2}, \quad [h_1]_{l'\gamma', l\gamma} = \left( E_1 + \lambda_0 + \frac{b_0 |v_1 v_2| 2l}{l_B^2} \right) \delta_{l'l} \delta_{\gamma', -\gamma} + \frac{b_0 |v_1 v_2|}{l_B^2} \delta_{l'l} \delta_{\gamma', \gamma}, \quad [h_1]_{l\gamma, 0} = [h_1]_{0, l\gamma} = 0, \quad (34)$$

where  $\gamma, \gamma' = \pm$ . On the other hand,  $h_2$  couples LLs of  $h_0$  with different energies since  $h_2$  is linear in  $D_x$  and  $D_y$ . When the  $l$  is not too large, the inter-LL coupling given by  $h_2$  is of order  $\frac{\sqrt{|v_1 v_2|}}{l_B} \frac{v_3}{|v_2|}$  or  $\frac{\sqrt{|v_1 v_2|}}{l_B} \frac{v_0}{|v_2|}$ , while the LL spacing of  $h_0$  is of order  $\frac{\sqrt{|v_1 v_2|}}{l_B}$ . According to Eq. (28), we have  $|v_0/v_2| \sim |v_3/v_2| \ll 1$ , suggesting  $h_2$  can be neglected

for relatively low  $l$ . With this approximation, the LLs of  $\tilde{h}_{+,\uparrow}$  reads

$$\epsilon_0^{\mathbf{K}^{+,\uparrow}} = E_0 + \mu_B B + E_1 + \lambda_0 + b_0 \frac{|v_1 v_2|}{l_B^2} \text{ and } \epsilon_{l,\pm}^{\mathbf{K}^{+,\uparrow}} = E_0 + \mu_B B + b_0 \frac{|v_1 v_2|}{l_B^2} \pm \sqrt{\frac{2|v_1 v_2|l}{l_B^2} + (E_1 + \lambda_0 + b_0 \frac{|v_1 v_2|}{l_B^2} 2l)^2}. \quad (35)$$

By flipping the sign of  $v_0, v_1, E_1, v_2, \lambda_0, b_0, \mu_B$  in the above equation, the LLs of  $\tilde{h}_{-,\uparrow}$  should have energies

$$\epsilon_0^{\mathbf{K}^{-,\downarrow}} = E_0 - \mu_B B - E_1 - \lambda_0 - b_0 \frac{|v_1 v_2|}{l_B^2} \text{ and } \epsilon_{l,\pm}^{\mathbf{K}^{-,\downarrow}} = E_0 - \mu_B B - b_0 \frac{|v_1 v_2|}{l_B^2} \pm \sqrt{\frac{2|v_1 v_2|l}{l_B^2} + (-E_1 - \lambda_0 - b_0 \frac{|v_1 v_2|}{l_B^2} 2l)^2}. \quad (36)$$

Eq. (35) and Eq. (36) together give the LLs relevant to the experiment, and it is clearly shown that the valley splitting is given by the Zeeman term  $\mu_B$  and the  $\mathbf{q}$ -quadratic terms  $b_0$ . In order to verify the Eq. (35) and Eq. (36), we numerically solve the LLs with a cutoff on  $l$ :  $l \leq 50$ . The parameter choice is given by Eq. (28) and  $b_0 = 1.5\text{eV}^{-1}$ . During the procedure, we also represent the  $h_2$  in  $\{|\phi_0\rangle, |\phi_l^\pm\rangle\}$  bases using the fact that  $[\hat{a}^\dagger \tau_0]_{l'\gamma', l\gamma} = \frac{\sqrt{l+1} + \gamma\gamma'\sqrt{l}}{2} \delta_{l', l+1}$ ,  $[\hat{a}^\dagger \tau_0]_{1\gamma', 0} = \frac{1}{\sqrt{2}}$ ,  $[\hat{a}^\dagger \tau_z]_{l'\gamma', l\gamma} = \frac{\sqrt{l+1} - \gamma\gamma'\sqrt{l}}{2} \delta_{l', l+1}$ ,  $[\hat{a}^\dagger \tau_z]_{1\gamma', 0} = \frac{1}{\sqrt{2}}$  and the matrix elements of  $\hat{a}^\dagger \tau_0$  and  $\hat{a}^\dagger \tau_z$  are zero otherwise. As shown in supplementary Fig. 18, the match is quite good.

At the end of this part, we discuss the Shubnikov-de Haas oscillation in the presence of disorder. The disorder effect to the LLs can be included by introducing a Gaussian disorder broadening to the density of states (DOS):

$$DOS(E) = \frac{1}{2\pi l_B^2} \sum_n \frac{1}{\sqrt{\pi\Gamma^2}} \exp\left(-\frac{(E - E_n)^2}{\Gamma^2}\right), \quad (37)$$

where  $\Gamma = \Gamma_0 \sqrt{B/\text{Tesla}}$ ,  $\Gamma_0$  is the disorder broadening parameter, and  $n$  sums over all the LLs in Eq. (35) and Eq. (36). [18] From the above equation, we can determine the Fermi energy in presence of the disorder broadening by  $\int_{E_0}^{E_F} DOS(E) dE = -n_0$ , where the minus sign is due to the hole doping of the material. With the determined Fermi energy, we can then plot Fig. 4(f) of the main text with parameter choices Eq. (28), and  $\Gamma_0 = 2$  or  $3\text{meV}$ .



- 
- [1] J. Liu, J. Hu, H. Cao, Y. Zhu, A. Chuang, D. Graf, D. J. Adams, S. M. A. Radmanesh, L. Spinu, I. Chiorescu, and Z. Mao, *Scientific Reports* **6**, 30525 (2016).
- [2] S. Huang, J. Kim, W. A. Shelton, E. W. Plummer, and R. Jin, *Proceedings of the National Academy of Sciences* **114**, 6256 (2017).
- [3] M. A. Farhan, G. Lee, and J. H. Shim, *Journal of Physics: Condensed Matter* **26**, 042201 (2014).
- [4] G. Cordier and H. Schäfer, *Zeitschrift für Naturforschung B* **32**, 383 (1977).
- [5] M. Fiebig, V. V. Pavlov, and R. V. Pisarev, *J. Opt. Soc. Am. B* **22**, 96 (2005).
- [6] S. A. Denev, T. T. A. Lummen, E. Barnes, A. Kumar, and V. Gopalan, *Journal of the American Ceramic Society* **94**, 2699 (2011), <https://ceramics.onlinelibrary.wiley.com/doi/pdf/10.1111/j.1551-2916.2011.04740.x>.
- [7] S. Lei, M. Gu, D. Puggioni, G. Stone, J. Peng, J. Ge, Y. Wang, B. Wang, Y. Yuan, K. Wang, Z. Mao, J. M. Rondinelli, and V. Gopalan, *Nano Letters* **18**, 3088 (2018), pMID: 29631404.
- [8] J. Liu, J. Hu, D. Graf, T. Zou, M. Zhu, Y. Shi, S. Che, S. Radmanesh, C. Lau, L. Spinu, *et al.*, *Nature communications* **8**, 646 (2017).
- [9] A. Pippard, *The Dynamics of Conduction Electrons* (Gordon & Breach: New York, 1965).
- [10] A. B. Pippard, *Magnetoresistance in metals*, Vol. 2 (Cambridge university press, 1989).
- [11] D. Shoenberg, *Magnetic oscillations in metals* (Cambridge university press, 1984).
- [12] M. V. Kartsovnik, *Chemical Reviews* **104**, 5737 (2004).
- [13] J. Hu, Z. Tang, J. Liu, Y. Zhu, J. Wei, and Z. Mao, *Phys. Rev. B* **96**, 045127 (2017).
- [14] M. V. Kartsovnik, *Chemical Reviews* **104**, 5737 (2004).
- [15] H. Masuda, H. Sakai, M. Tokunaga, M. Ochi, H. Takahashi, K. Akiba, A. Miyake, K. Kuroki, Y. Tokura, and S. Ishiwata, *Phys. Rev. B* **98**, 161108 (2018).
- [16] D. Shoenberg, *Magnetic oscillations in metals* (Cambridge university press, 2009).
- [17] S. Altmann and P. Herzog, *Point-group theory tables* (Oxford, 1994).
- [18] E. G. Novik, A. Pfeuffer-Jeschke, T. Jungwirth, V. Latussek, C. R. Becker, G. Landwehr, H. Buhmann, and L. W. Molenkamp, *Phys. Rev. B* **72**, 035321 (2005).
